# Supplementary material for: Solvent-polarity reconfigurable fluorescent 4-piperazino-N-aryl-1,8-naphthalimide crown ether logic gates
Source: Royal Society of Chemistry journal article supplement (doi:10.1039/d2ra07568g), 2022-01-01
Supplement: d2ra07568g1.pdf [file d2ra07568g1.pdf]

## Supporting Information

*RSC Advances*

### **Solvent-polarity reconfigurable fluorescent 4-piperazino- N-aryl-1,8-naphthalimide crown ether logic gates**

Gabriel Gauci and David C. Magri\*

Department of Chemistry, Faculty of Science  
University of Malta, Msida, Malta, MSD 2080  
email: david.magri@um.edu.mt  
Phone: (+356) 2340 2276

## Table of Contents

|                                                                                    |     |
|------------------------------------------------------------------------------------|-----|
| 1. Experimental.....                                                               | S2  |
| 2. Characterisation data of <b>1-4</b> .....                                       | S3  |
| 2.1. <sup>1</sup> H NMR spectra of <b>1-4</b> .....                                | S3  |
| 2.2. <sup>13</sup> C and <sup>13</sup> C DEPT-135 NMR spectra of <b>1-4</b> .....  | S5  |
| 2.3. HRMS spectra of <b>1-4</b> .....                                              | S7  |
| 2.4. IR spectra of <b>1-4</b> . .....                                              | S9  |
| 3. UV-vis absorption and fluorescence emission spectra for <b>1-4</b> .....        | S11 |
| 3.1. Proton UV-vis absorption spectra for <b>1-4</b> .....                         | S11 |
| 3.2. Cation UV-vis absorption and emission spectra for <b>3</b> and <b>4</b> ..... | S15 |
| 3.3. Spectroscopic data for <b>1-4</b> .....                                       | S19 |
| 4. NMR solvent studies for <b>3</b> and <b>4</b> .....                             | S20 |

# 1. Experimental

All reagents were purchased from commercial suppliers and used without further purification: 4'-aminobenzo-18-crown-6 (98%, Fluka), 4'-aminobenzo-15-crown-5 (97%, Sigma-Aldrich), 3,4-dimethoxyaniline (>98%, TCI), aniline (GPR, BDH), 4-chloro-1,8-naphthalic anhydride (94%, Alfa Aesar), piperazine (>99%, Sigma Aldrich), hydrochloric acid (37 %, Sigma Aldrich), tetramethylammonium hydroxide (25 % (w/w) in water, Sigma Aldrich), chloroform-*d* (99.8 atom % D with 0.03% TMS, Sigma Aldrich), deuterium oxide (99.9 atom % D, Sigma Aldrich), methanol-*d*<sub>4</sub> (99.8 atom % D with 0.03% TMS, Sigma Aldrich). HPLC grade solvents were purchased from Carlo Erba. The 4-chloro-*N*-aryl-1,8-naphthalimide intermediates were synthesised according to our previous work.<sup>1</sup> Metal cations were used as the chloride salts.

NMR spectra were acquired with a Bruker Avance III HD NMR spectrometer fitted with an Ascend 500 11.75 Tesla superconducting magnet and a multinuclear 5mm PABBO probe. The frequencies are 500.13 MHz for <sup>1</sup>H-NMR and 125.76 MHz for <sup>13</sup>C-NMR, respectively. Data were analysed and processed with Topspin version 4.0.5. Chemical shifts were reported in ppm downfield with respect to TMS at 0.00 ppm at 298 K. Data for <sup>1</sup>H-NMR is reported with multiplicity (s = singlet, d = doublet, t = triplet, m = multiplet). Infrared spectra were recorded using a Shimadzu IR-Affinity-1 spectrophotometer between 4000-500 cm<sup>-1</sup>. High resolution mass spectrometry (HRMS) was performed by ESI-ToF outsourced to Medac Ltd. (UK). <http://medacltd.com/>

Ultraviolet-visible absorption spectroscopy data was obtained with a dual beamed Jasco V-650 spectrophotometer and processed with Spectra Manager V.2.0. Spectra were recorded at 1 nm data intervals and a scan rate of 400 nm/min. The fluorescence spectra were acquired with a Jasco FP-8300 spectrophotometer and processed with the same version of Spectra Manager. Quartz SUPRASIL cuvettes (101-10-40) with 10 mm pathlength with transparent windows on all four sides were used. The excitation wavelengths were the absorbance maxima. The parameters for the data acquisition were data intervals of 0.2 nm, excitation bandwidth of 2.5 nm, emission bandwidth of 2.5 nm, scan rate of 500 nm/min and a sensitivity response set to high. The pH was monitored using a HANNA pH 210 Microprocessor pH meter. The pH meter was calibrated with buffer solutions of pH 7.0 and pH 4.0.

The quantum yields of **1-4** in various solvents were determined via the relative determination method, using quinine hemisulfate monohydrate in 0.1 M sulfuric acid as the reference compound ( $\phi_{ref} = 0.546$ ).

$$\phi_{smp} = \phi_{ref} \times \frac{I_{smp}}{I_{ref}} \times \frac{A_{ref}}{A_{smp}} \times \frac{n_{smp}^2}{n_{ref}^2}$$

where  $\phi_{smp}$  is the relative fluorescence quantum yield of the sample,  $\phi_{ref}$  is the fluorescence quantum yield of the reference standard,  $I_{smp}$  is the emission area of the sample,  $I_{ref}$  is the emission area of the reference standard,  $A_{ref}$  is the absorbance of the reference standard,  $A_{smp}$  is the absorbance of the sample,  $n_{smp}$  is the solvent refractive index of the sample, and  $n_{std}$  is the solvent refractive index of the reference standard.

## References

1. A. Diacono, M. C. Aquilina, A. Calleja, G. Agius, G. Gauci, K. Szaciłowski, and D. C. Magri, *Org. Biomol. Chem.*, 2020, **18**, 4773.

## 2. Characterisation data of 1-4

### 2.1. <sup>1</sup>H NMR spectra of 1-4

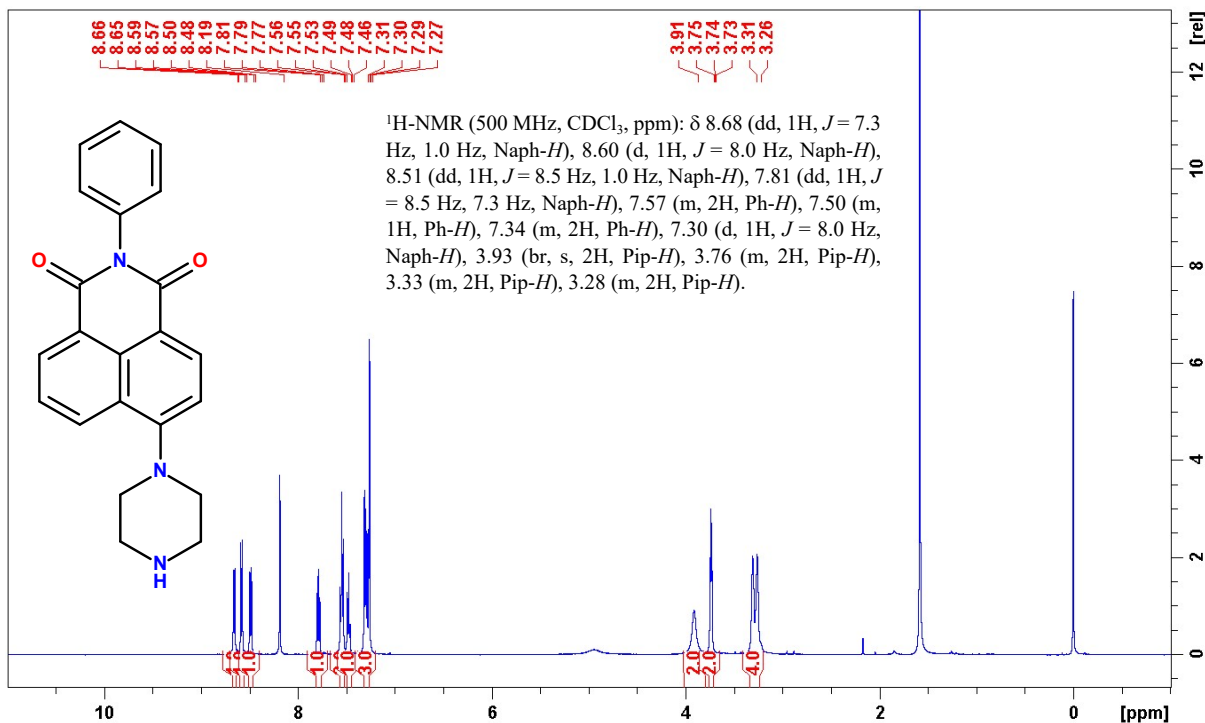

Figure S1. <sup>1</sup>H NMR spectrum of 4-piperazino-*N*-phenyl-1,8-naphthalimide **1** in CDCl<sub>3</sub> (with 0.03% TMS).

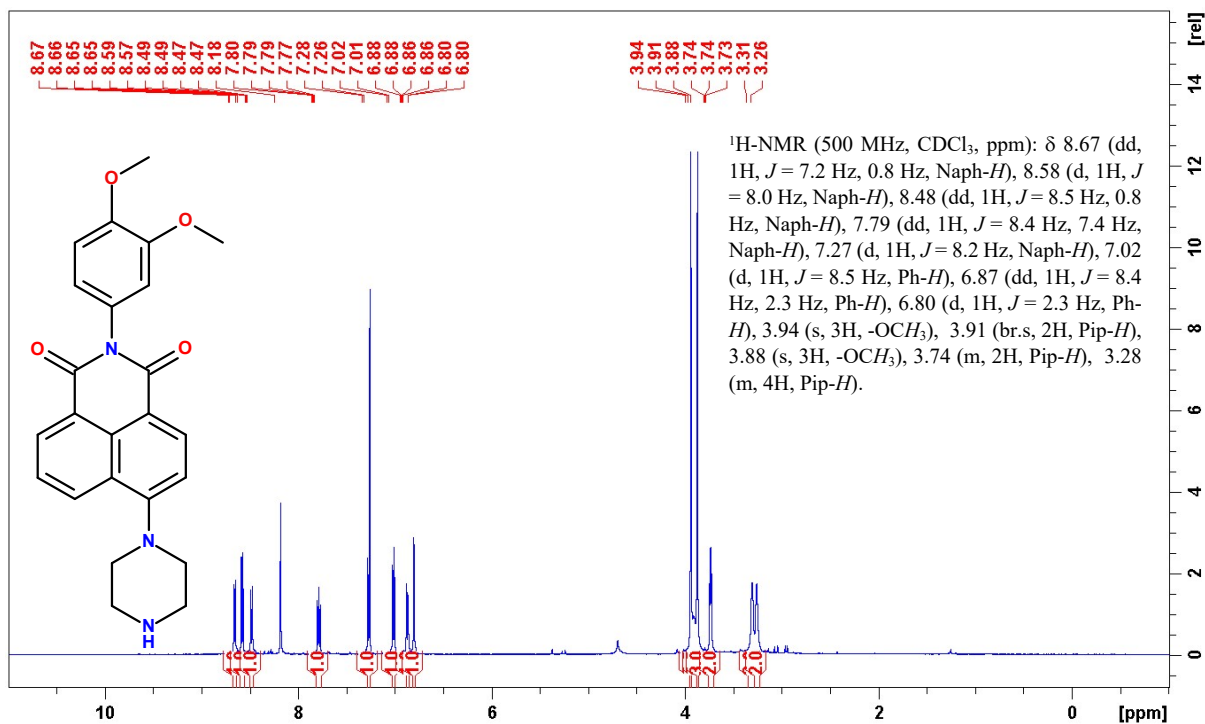

Figure S2. <sup>1</sup>H NMR spectrum of 4-piperazino-*N*-(3,4-dimethoxyphenyl)-1,8-naphthalimide **2** in CDCl<sub>3</sub>.

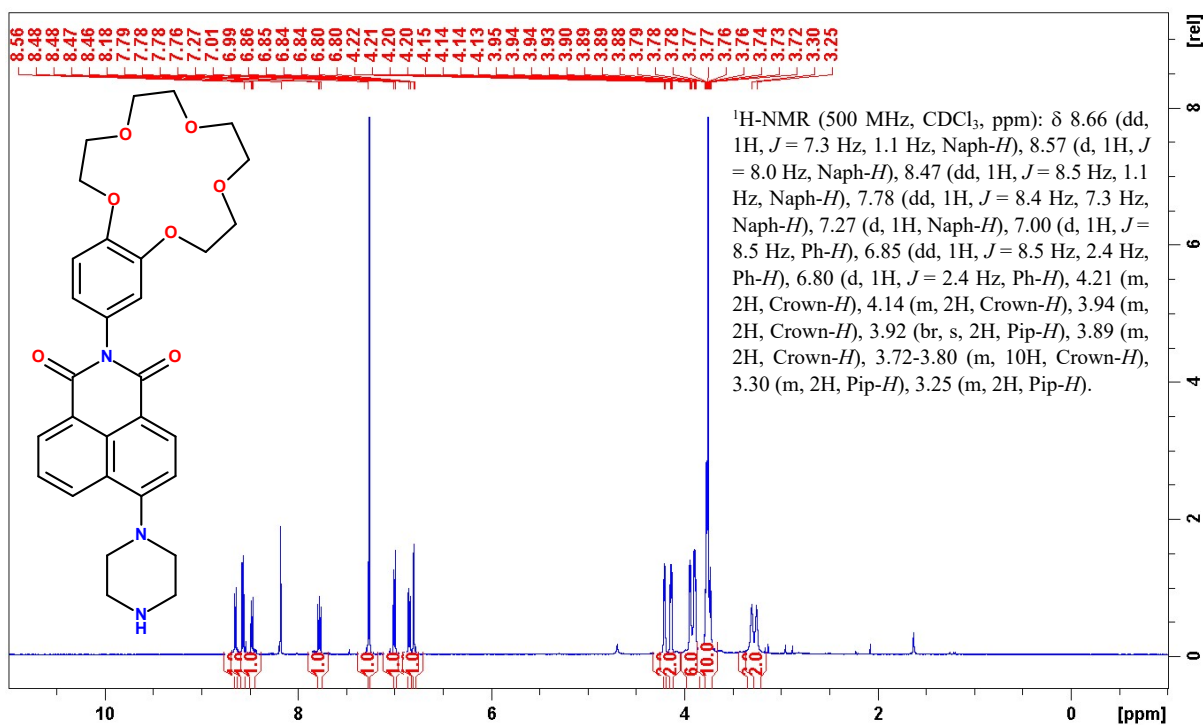

Figure S3. <sup>1</sup>H NMR spectrum of 4-piperazino-*N*-(benzo-15-crown-5)-1,8-naphthalimide **3** in CDCl<sub>3</sub>.

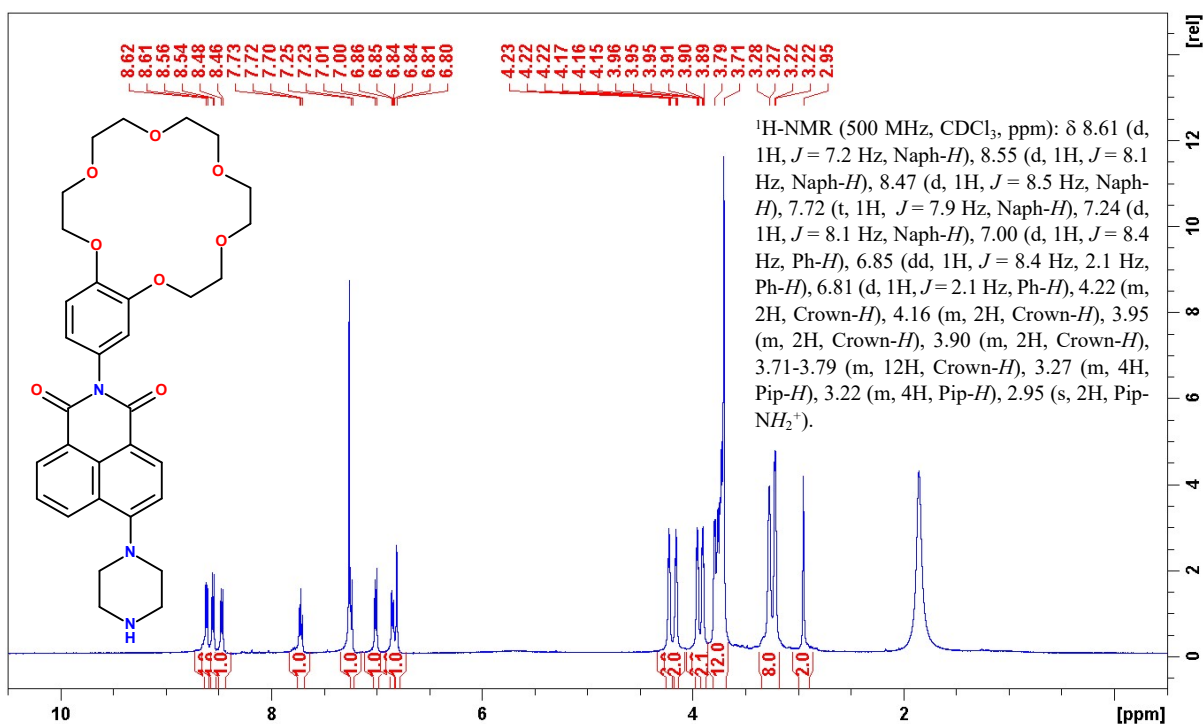

Figure S4. <sup>1</sup>H NMR spectrum of 4-piperazino-*N*-(benzo-18-crown-6)-1,8-naphthalimide **4** in CDCl<sub>3</sub>.

## 2.2. $^{13}\text{C}$ and $^{13}\text{C}$ DEPT-135 NMR spectra of 1-4

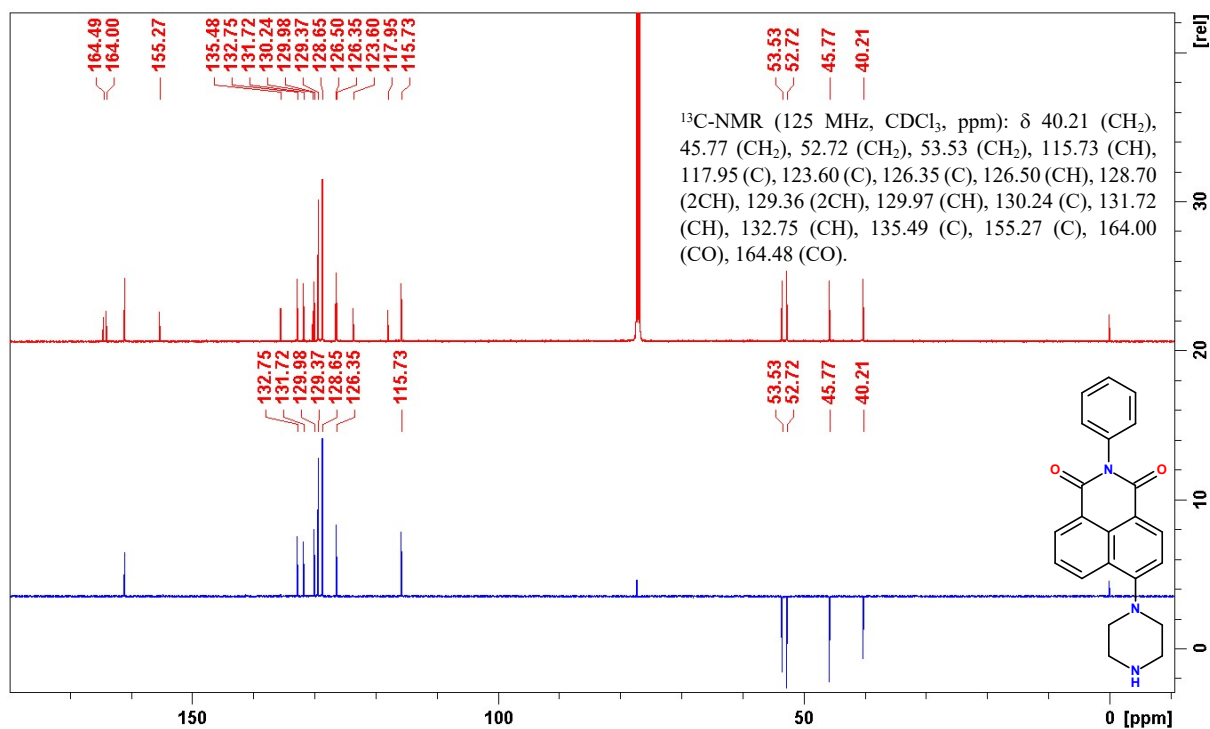

**Figure S5.**  $^{13}\text{C}$  NMR (top) and  $^{13}\text{C}$  DEPT-135 (bottom) spectra of 4-piperazino-*N*-phenyl-1,8-naphthalimide **1** in  $\text{CDCl}_3$  (with 0.03% TMS).

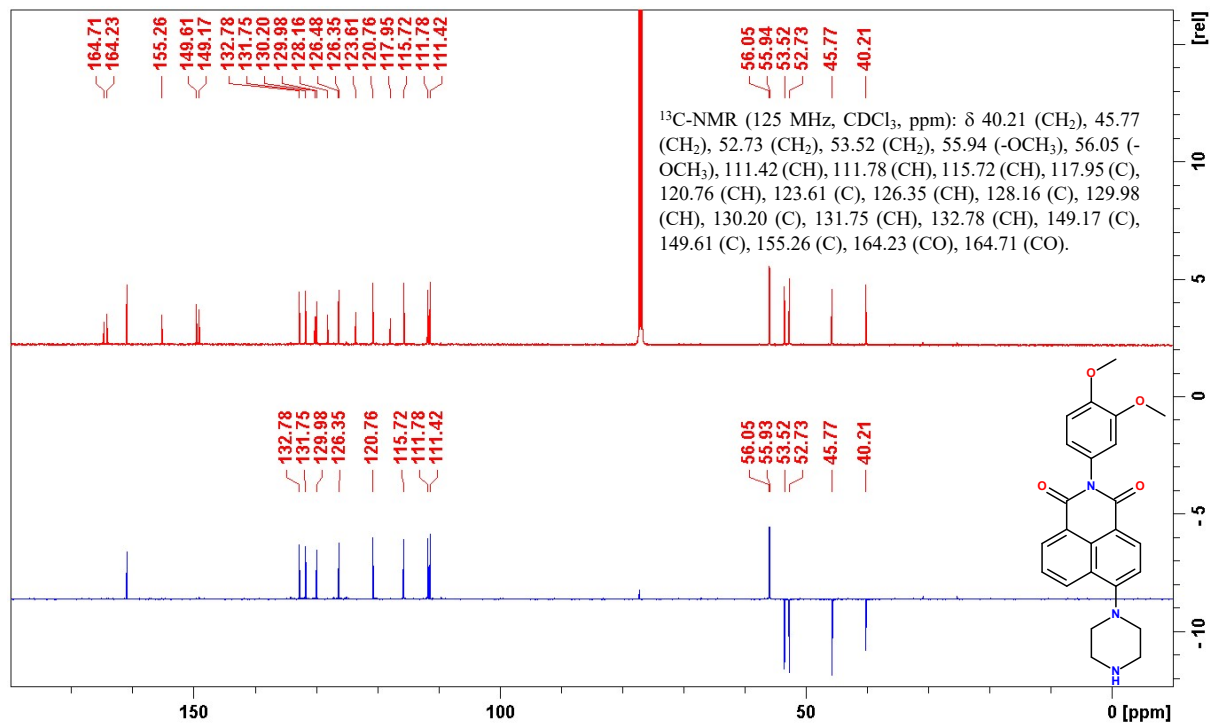

**Figure S6.**  $^{13}\text{C}$  NMR (top) and  $^{13}\text{C}$  DEPT-135 (bottom) spectra of 4-piperazino-*N*-(3,4-dimethoxyphenyl)-1,8-naphthalimide **2** in  $\text{CDCl}_3$ .

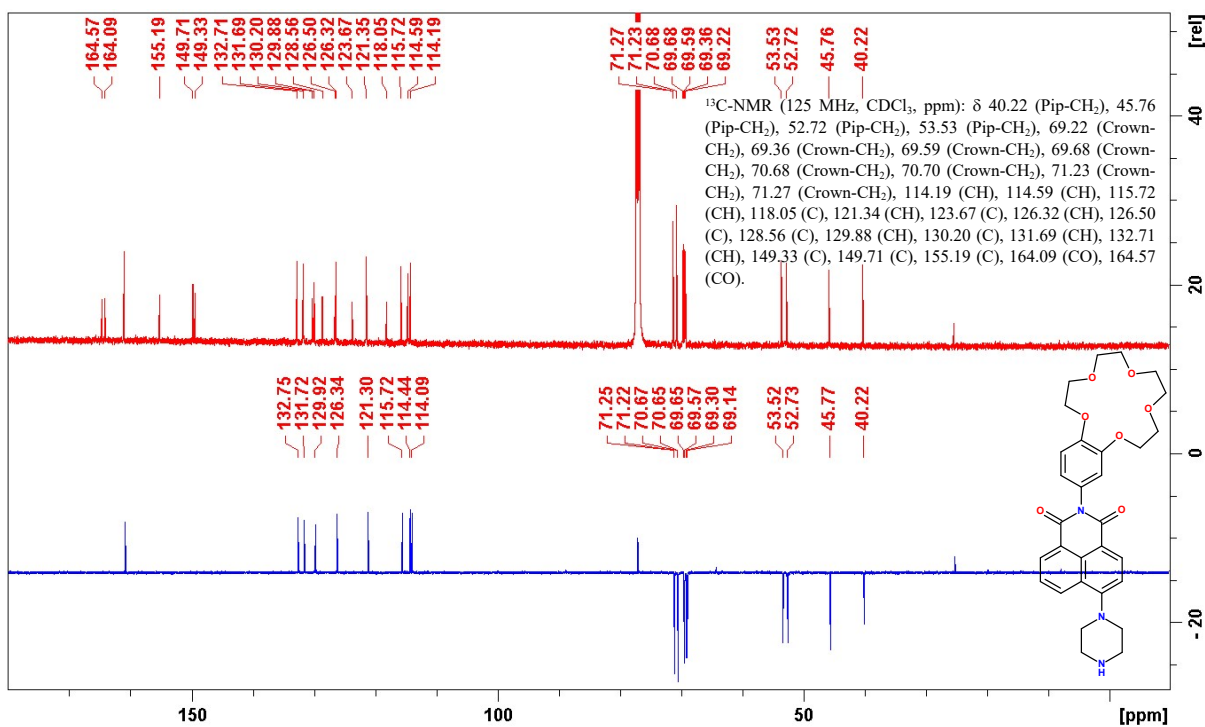

**Figure S7.** <sup>13</sup>C NMR (top) and <sup>13</sup>C DEPT-135 (bottom) spectra of 4-piperazino-*N*-(benzo-15-crown-5)-1,8-naphthalimide **3** in CDCl<sub>3</sub>.

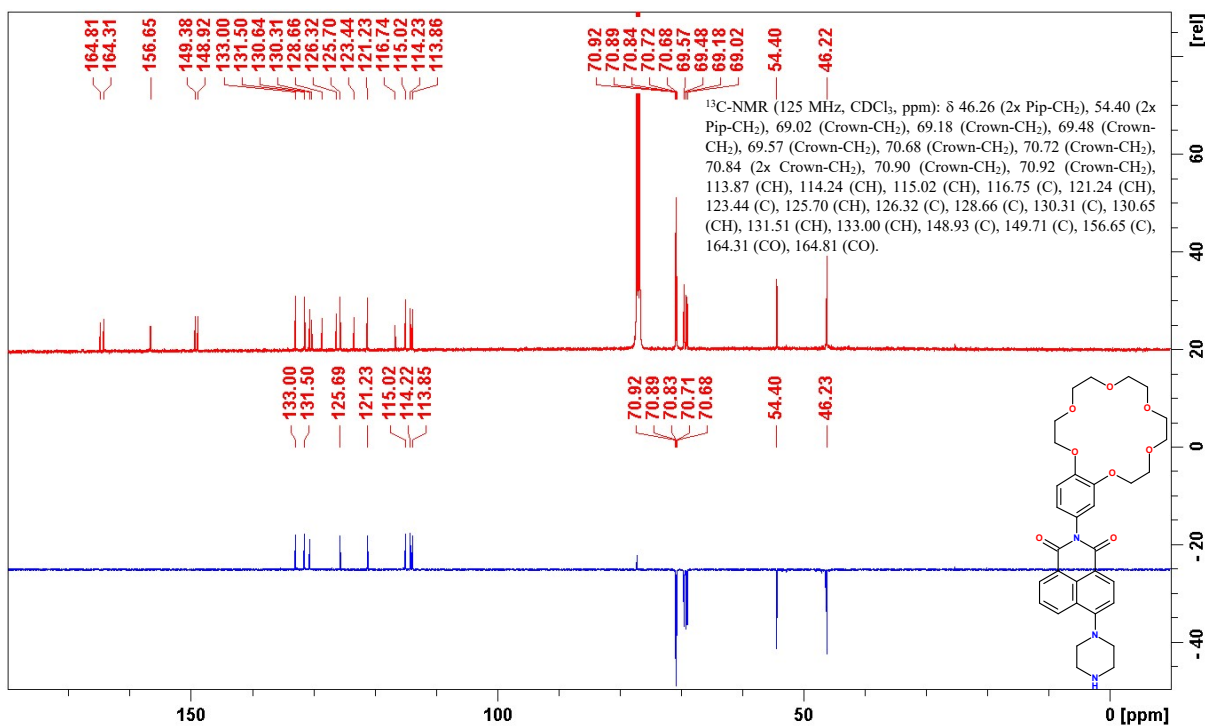

**Figure S8.** <sup>13</sup>C NMR (top) and <sup>13</sup>C DEPT-135 (bottom) spectra of 4-piperazino-*N*-(benzo-18-crown-6)-1,8-naphthalimide **4** in CDCl<sub>3</sub>.

### 2.3. HRMS spectra of 1-4

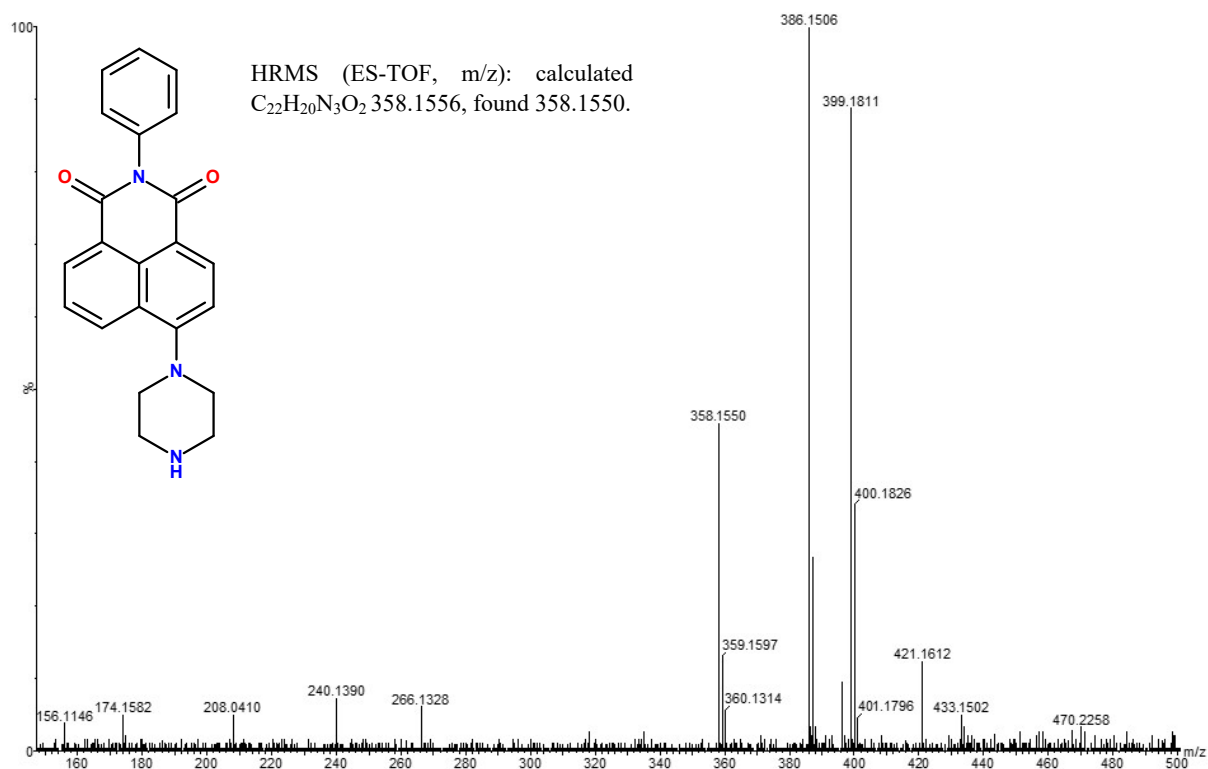

Figure S9. HRMS spectrum of 4-piperazino-*N*-phenyl-1,8-naphthalimide 1.

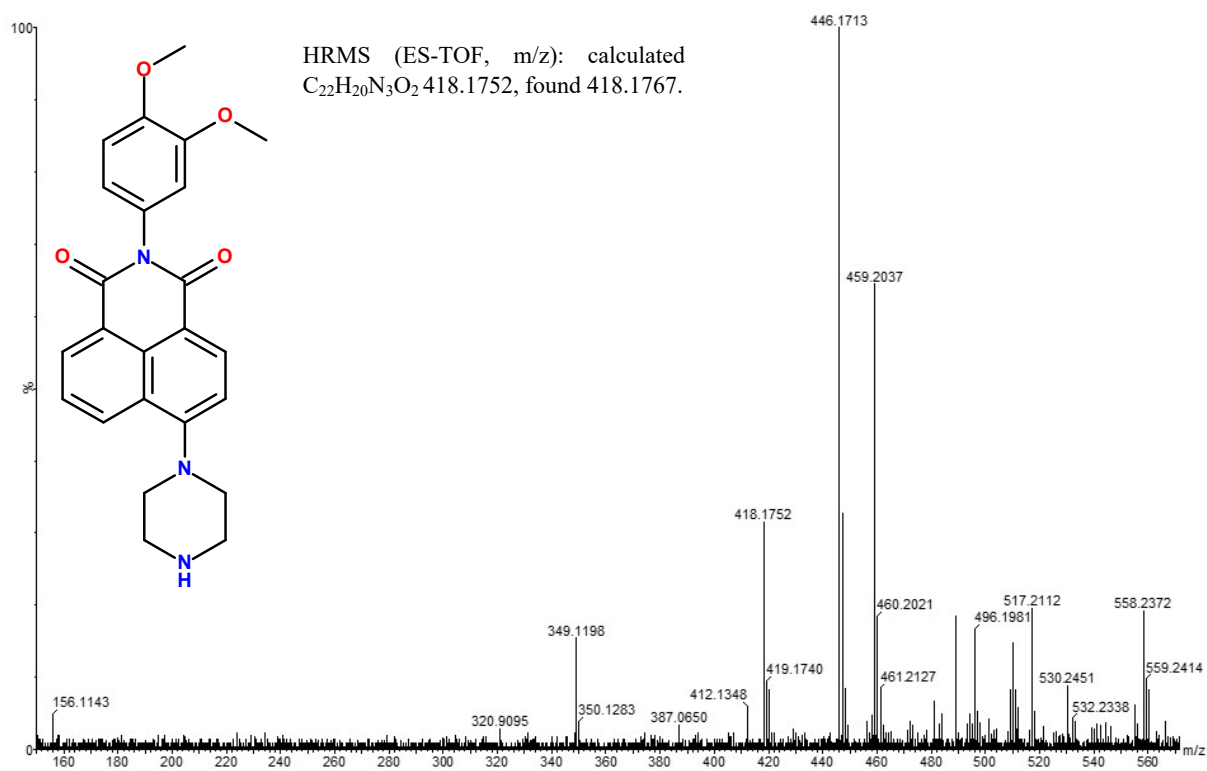

Figure S10. HRMS spectrum of 4-piperazino-*N*-(3,4-dimethoxyphenyl)-1,8-naphthalimide 2.



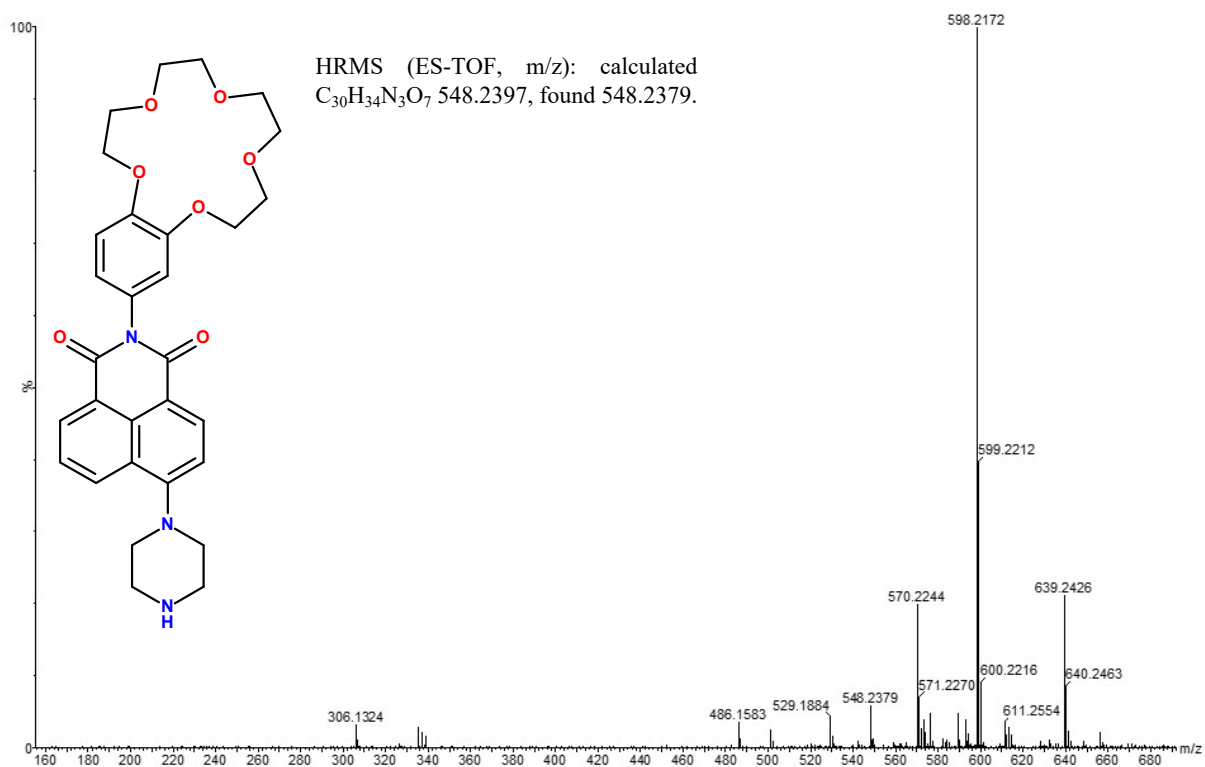

**Figure S11.** HRMS spectrum of 4-piperazino-*N*-(benzo-15-crown-5)-1,8-naphthalimide **3**.

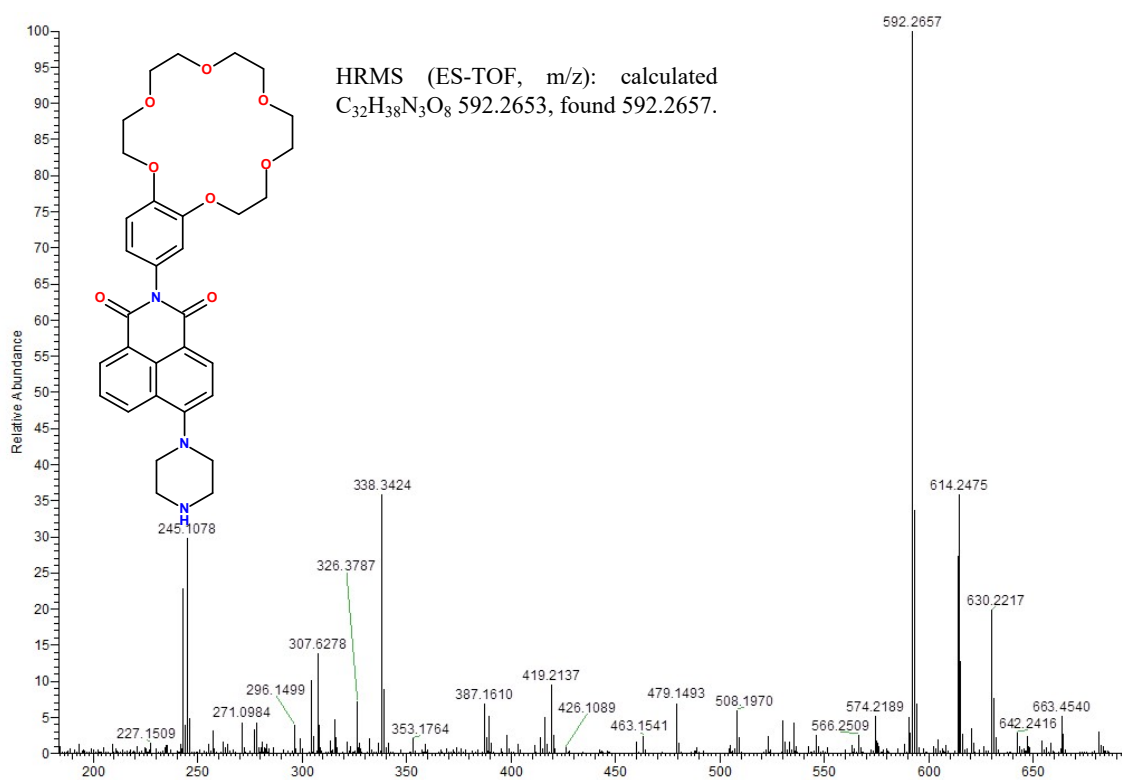

**Figure S12.** HRMS spectrum of 4-piperazino-*N*-(benzo-18-crown-6)-1,8-naphthalimide **4**.

## 2.4. IR spectra of 1-4.

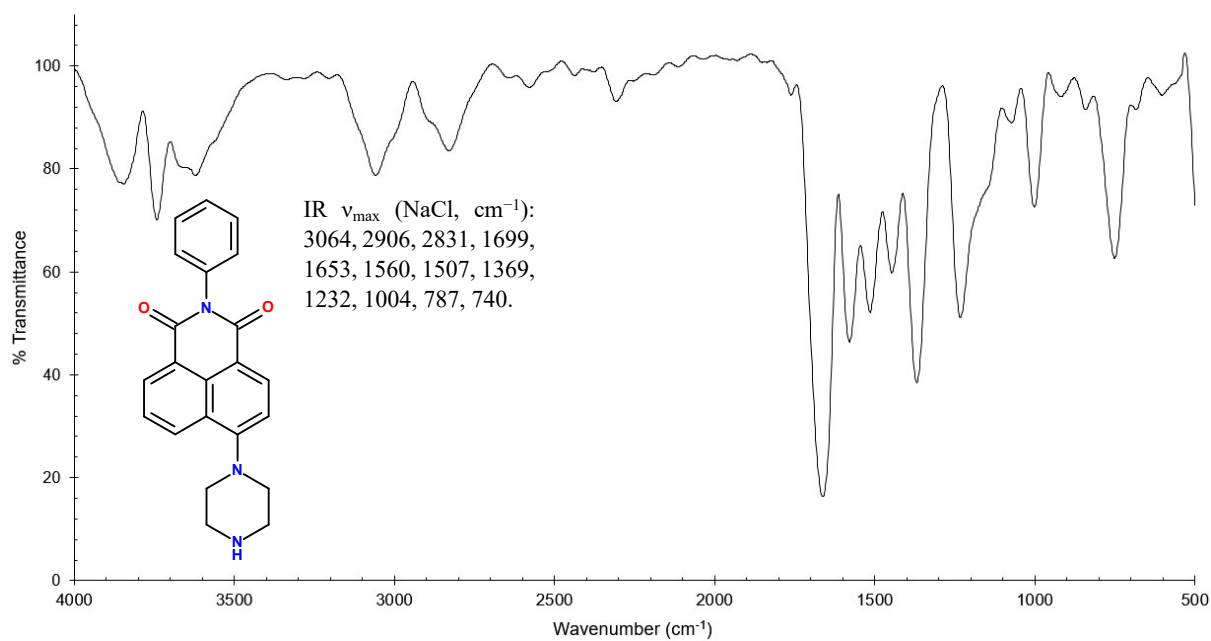

**Figure S13.** IR spectrum of 4-piperazino-*N*-phenyl-1,8-naphthalimide **1** (thin film on NaCl disk).

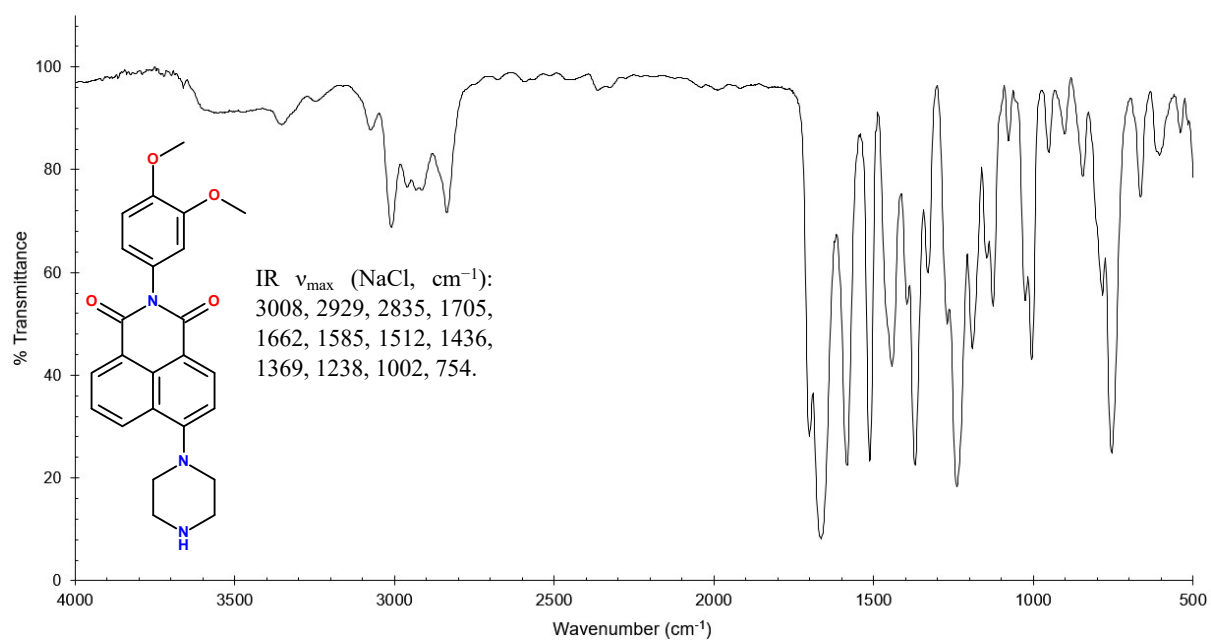

**Figure S14.** IR spectrum of 4-piperazino-*N*-(3,4-dimethoxyphenyl)-1,8-naphthalimide **2** (thin film on NaCl disk).

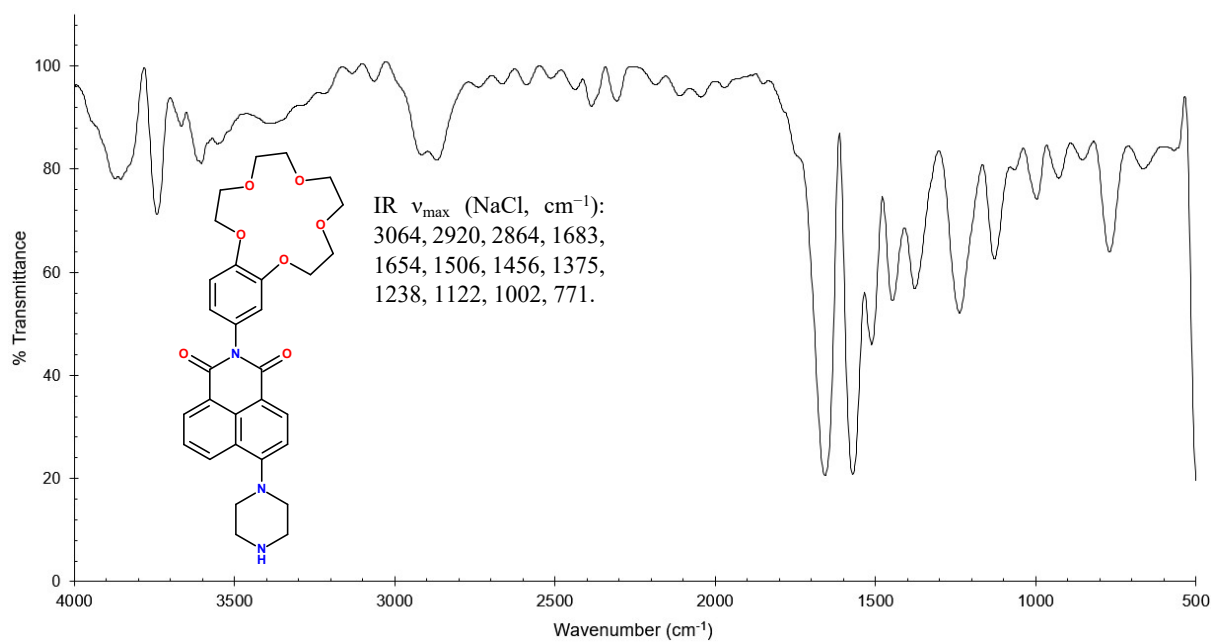

**Figure S15.** IR spectrum of 4-piperazino-*N*-(benzo-15-crown-5)-1,8-naphthalimide **3** (thin film on NaCl disk).

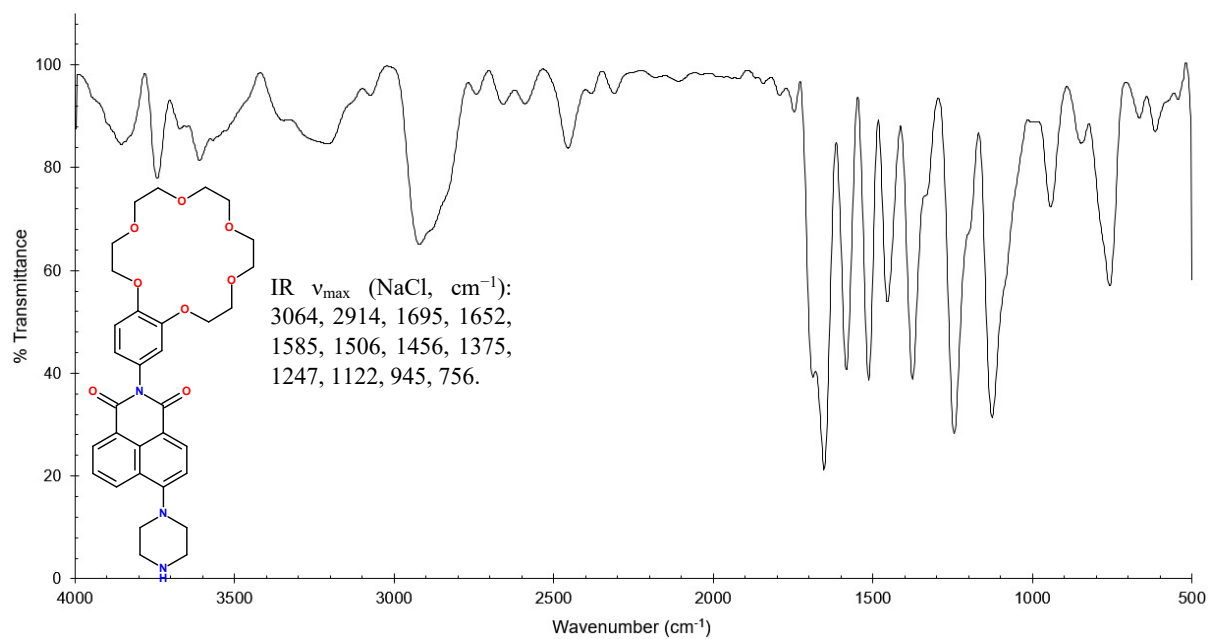

**Figure S16.** IR spectrum of 4-piperazino-*N*-(benzo-18-crown-6)-1,8-naphthalimide **4** (thin film on NaCl disk).

### 3. UV-vis absorption and fluorescence emission spectra for 1-4

#### 3.1. Proton UV-vis absorption spectra for 1-4

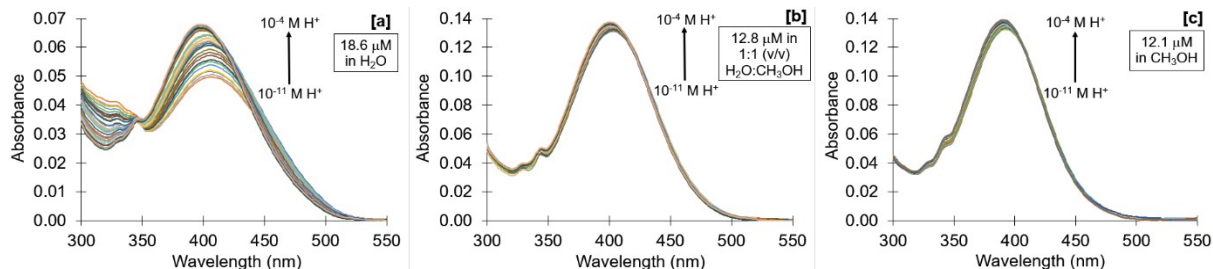

**Figure S17.** UV-visible absorption spectra for **1** as a function of  $H^+$  concentration in [a] water; [b] 1:1 (v/v) water/methanol; [c] methanol.

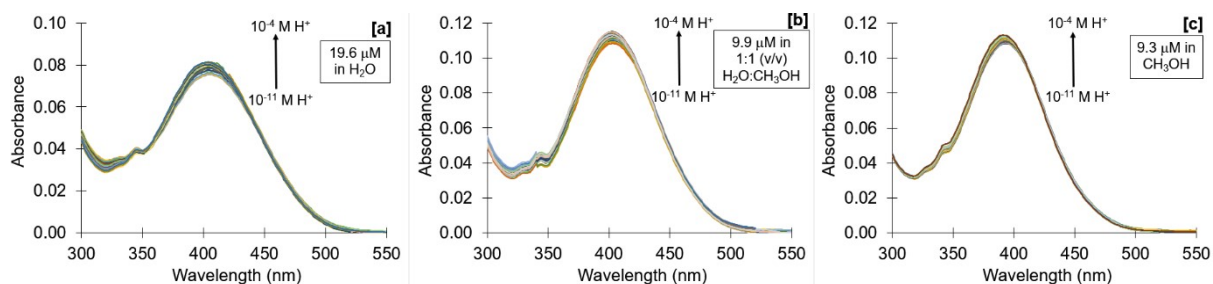

**Figure S18.** UV-visible absorption spectra for **2** as a function of  $H^+$  concentration in [a] water; [b] 1:1 (v/v) water/methanol; [c] methanol.

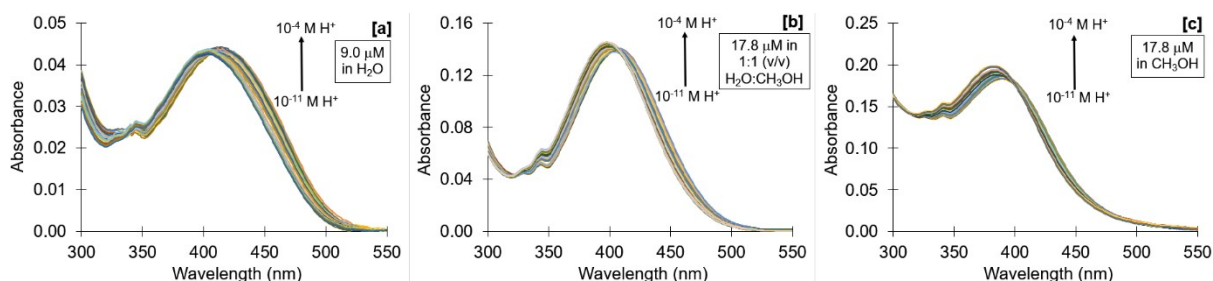

**Figure S19.** UV-visible absorption spectra for **3** as a function of  $H^+$  concentration in [a] water; [b] 1:1 (v/v) water/methanol; [c] methanol.

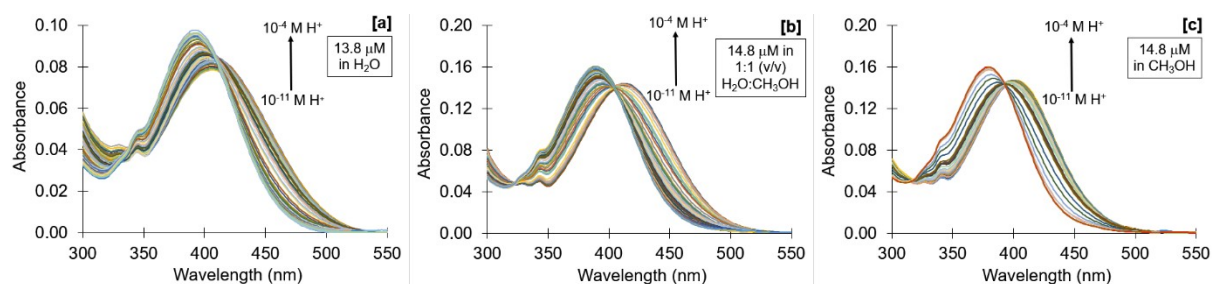

**Figure S20.** UV-visible absorption spectra for **4** as a function of  $H^+$  concentration in [a] water; [b] 1:1 (v/v) water/methanol; [c] methanol.

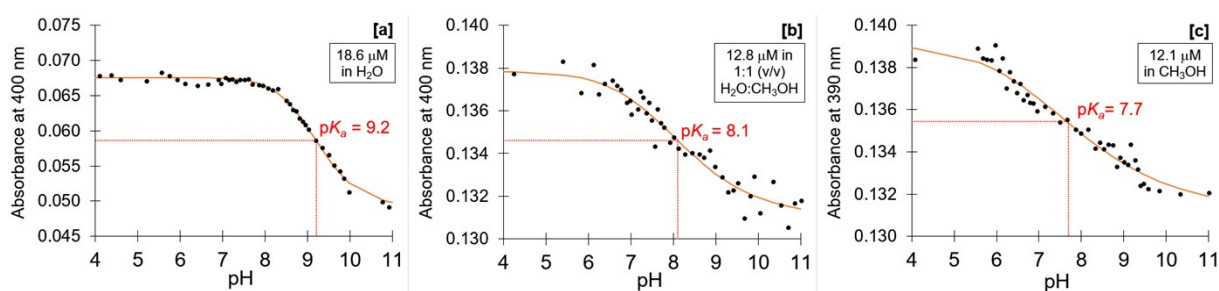

**Figure S21.** Absorbance against pH graphs for **1** in [a] water; [b] 1:1 (v/v) water/methanol; [c] methanol.

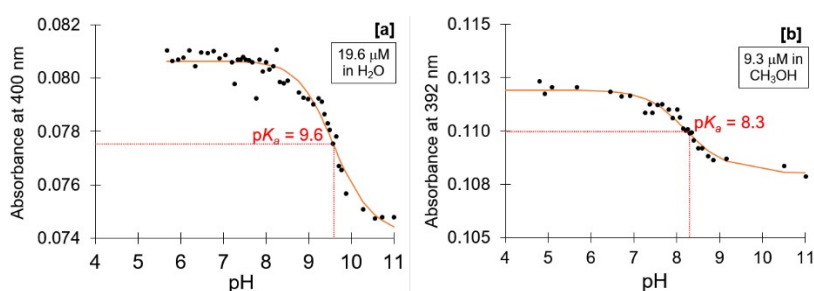

**Figure S22.** Absorbance against pH graphs for **2** in [a] water; [b] methanol.

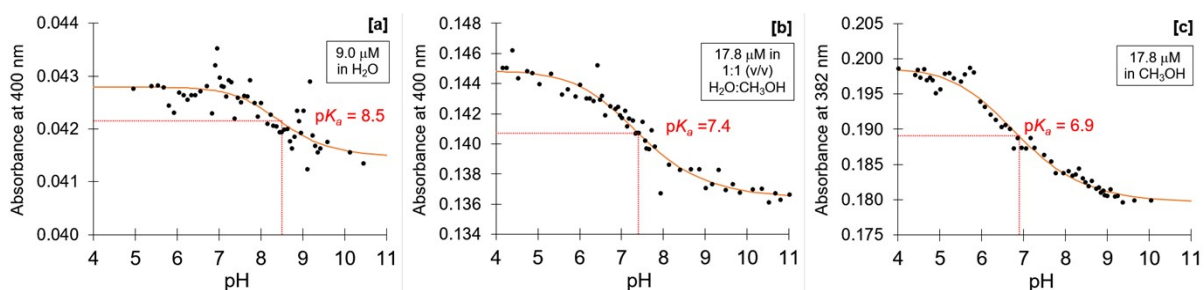

**Figure S23.** Absorbance against pH graphs for **3** in [a] water; [b] 1:1 (v/v) water/methanol; [c] methanol.

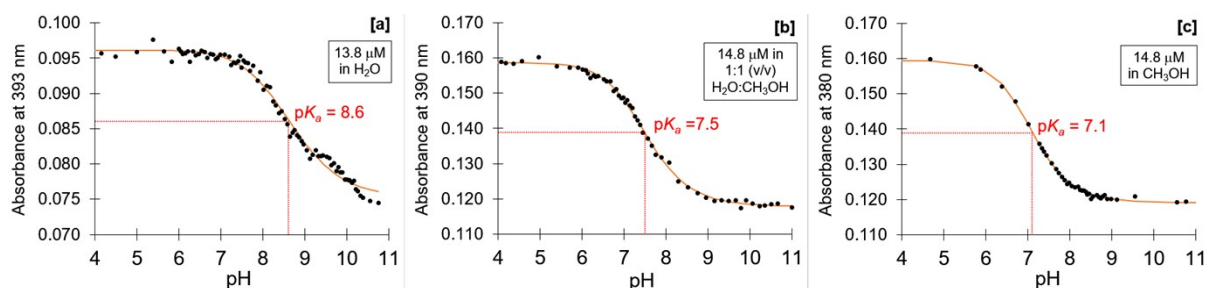

**Figure S24.** Absorbance against pH graphs for **4** in [a] water; [b] 1:1 (v/v) water/methanol; [c] methanol.

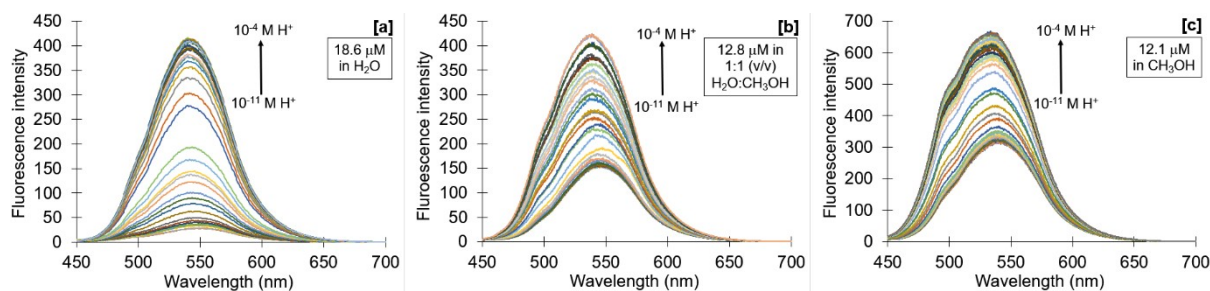

**Figure S25.** Fluorescence emission spectra for **1** as a function of  $H^+$  concentration in [a] water; [b] 1:1 (v/v) water/methanol; [c] methanol.  $\lambda_{ex} = 400$  nm.

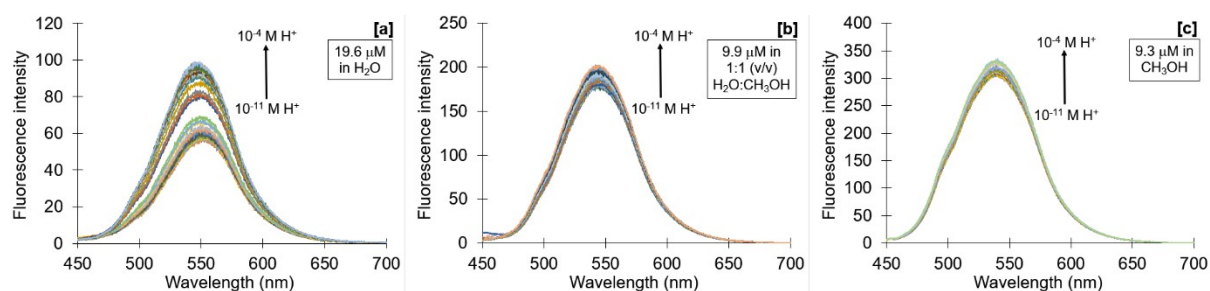

**Figure S26.** Fluorescence emission spectra for **2** as a function of  $H^+$  concentration in [a] water; [b] 1:1 (v/v) water/methanol; [c] methanol.  $\lambda_{ex} = 400$  nm.

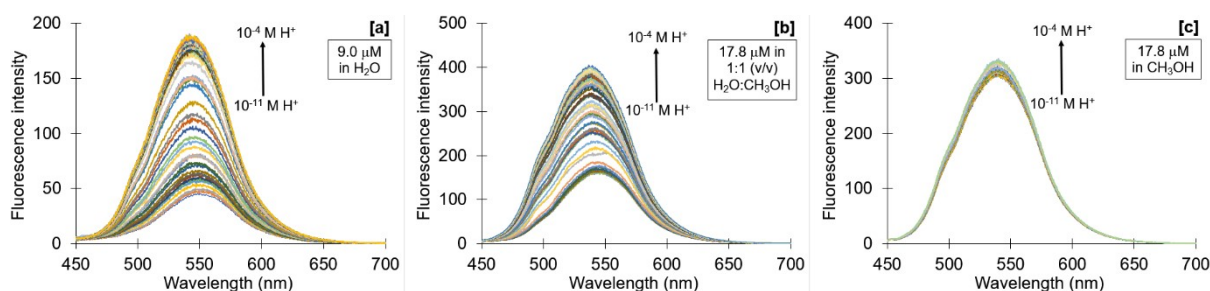

**Figure S27.** Fluorescence emission spectra for **3** as a function of  $H^+$  concentration in [a] water; [b] 1:1 (v/v) water/methanol; [c] methanol.  $\lambda_{ex} = 400$  nm.

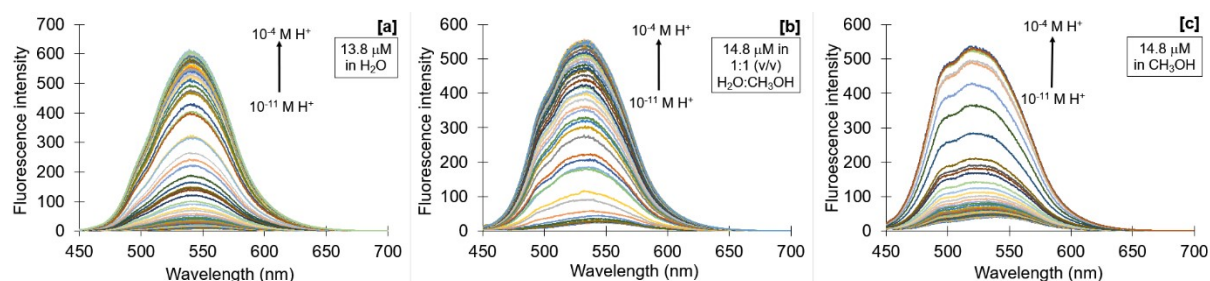

**Figure S28.** Fluorescence emission spectra for **4** as a function of  $H^+$  concentration in [a] water; [b] 1:1 (v/v) water/methanol; [c] methanol.  $\lambda_{ex} = 400$  nm.

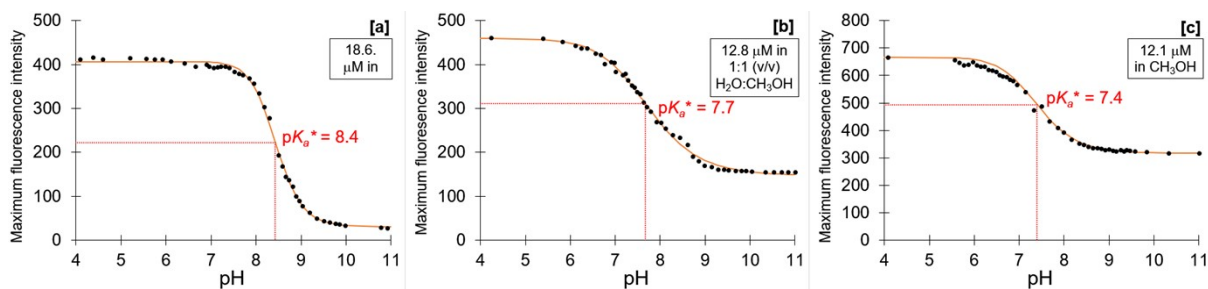

**Figure S29.** Maximum fluorescence intensity against pH graphs for **1** in [a] water; [b] 1:1 (v/v) water/methanol; [c] methanol.  $\lambda_{\text{ex}} = 400 \text{ nm}$ .

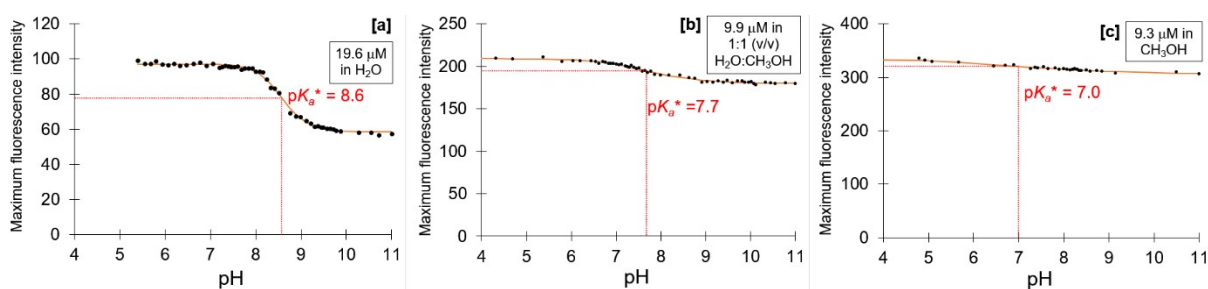

**Figure S30.** Maximum fluorescence intensity against pH graphs for **2** in [a] water; [b] 1:1 (v/v) water/methanol; [c] methanol.  $\lambda_{\text{ex}} = 400 \text{ nm}$ .

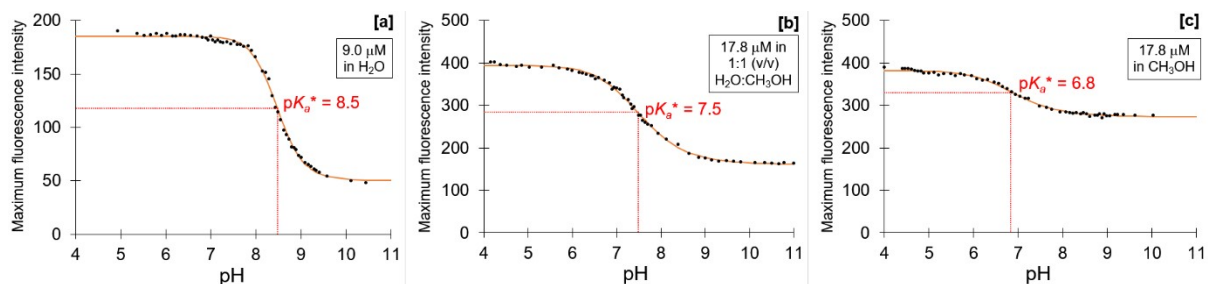

**Figure S31.** Maximum fluorescence intensity against pH graphs for **3** in [a] water; [b] 1:1 (v/v) water/methanol; [c] methanol.  $\lambda_{\text{ex}} = 400 \text{ nm}$ .

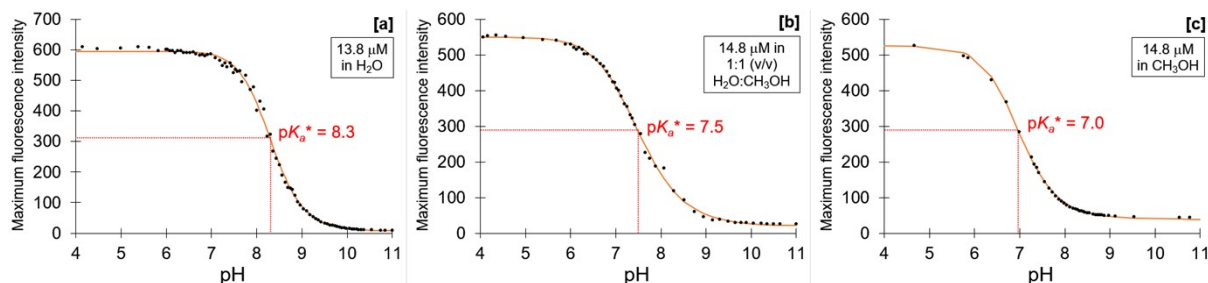

**Figure S32.** Maximum fluorescence intensity against pH graphs for **4** in [a] water; [b] 1:1 (v/v) water/methanol; [c] methanol.  $\lambda_{\text{ex}} = 400 \text{ nm}$ .

### 3.2. Cation UV-vis absorption and emission spectra for 3 and 4

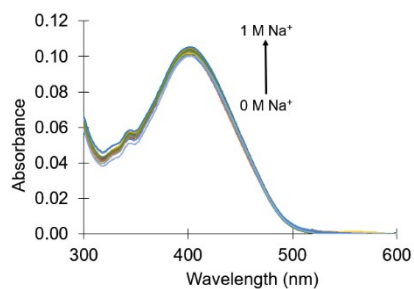

**Figure S33.** UV-visible absorption spectra for 10.6  $\mu\text{M}$  **3** as a function of Na<sup>+</sup> concentration in 1:1 (v/v) water/methanol.

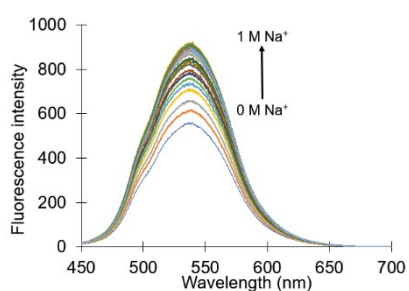

**Figure S34.** Fluorescence emission spectra for 10.6  $\mu\text{M}$  **3** as a function of Na<sup>+</sup> concentration in 1:1 (v/v) water/methanol.  $\lambda_{\text{ex}} = 400$  nm.

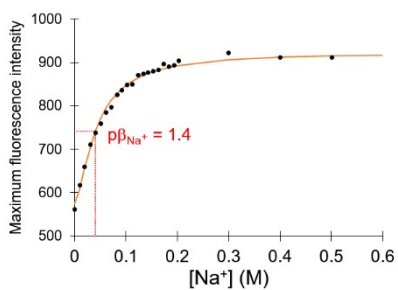

**Figure S35.** Maximum fluorescence intensity against Na<sup>+</sup> concentration graph for 10.6  $\mu\text{M}$  **3** in 1:1 (v/v) water/methanol.  $\lambda_{\text{ex}} = 400$  nm.



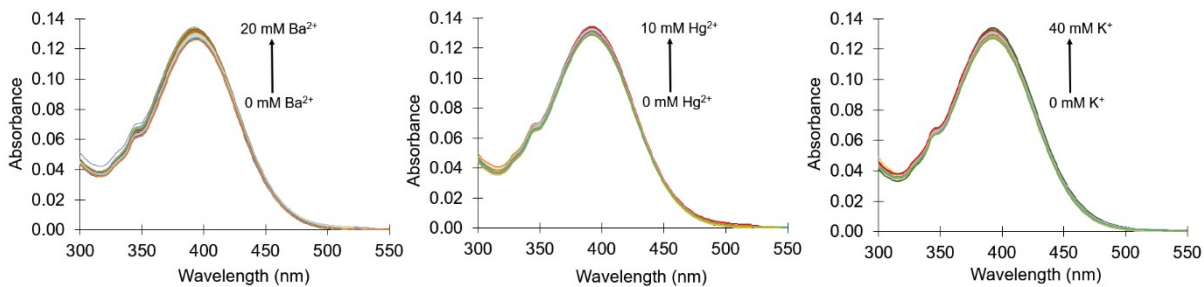

**Figure S36.** UV-visible absorption spectra for 14  $\mu\text{M}$  **4** as a function of  $\text{Ba}^{2+}$ ,  $\text{Hg}^{2+}$ , and  $\text{K}^{+}$  concentration in water.

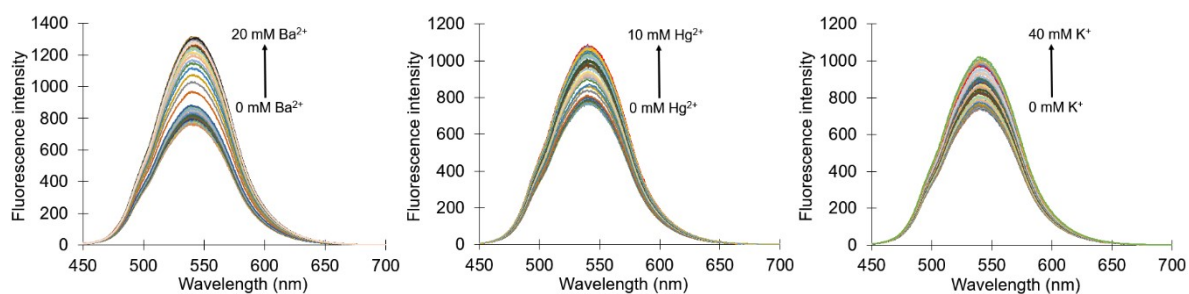

**Figure S37.** Fluorescence emission spectra for 14  $\mu\text{M}$  **4** as a function of  $\text{Ba}^{2+}$ ,  $\text{Hg}^{2+}$ , and  $\text{K}^{+}$  concentration in water.  $\lambda_{\text{ex}} = 400 \text{ nm}$ .

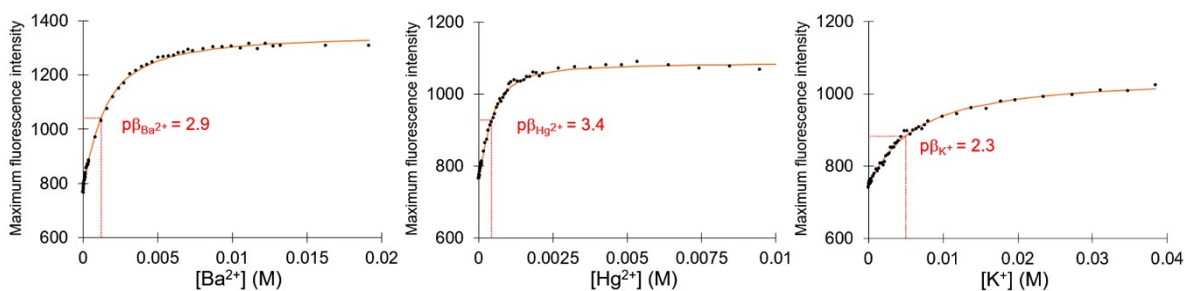

**Figure S38.** Maximum fluorescence intensity against cation concentration for 14  $\mu\text{M}$  **4** as a function of  $\text{Ba}^{2+}$ ,  $\text{Hg}^{2+}$ , and  $\text{K}^{+}$  concentration in water.  $\lambda_{\text{ex}} = 400 \text{ nm}$ .

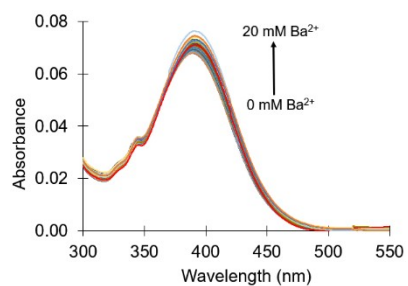

**Figure S39.** UV-visible absorption spectra for 7  $\mu\text{M}$  **4** as a function of  $\text{Ba}^{2+}$  concentration in 1:1 (v/v) water/methanol.

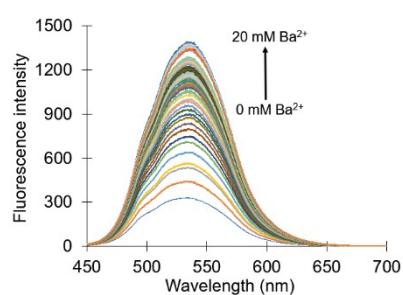

**Figure S40.** Fluorescence emission spectra for 7  $\mu\text{M}$  **4** as a function of  $\text{Ba}^{2+}$  in 1:1 (v/v) water/methanol.  $\lambda_{\text{ex}} = 400$  nm.

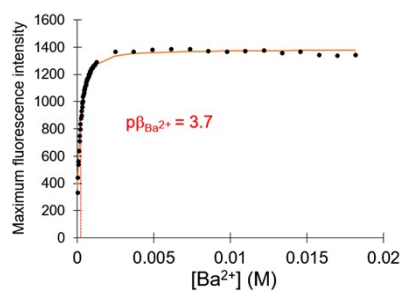

**Figure S41.** Maximum fluorescence intensity against  $\text{Ba}^{2+}$  concentration for 7  $\mu\text{M}$  **4** in 1:1 (v/v) water/methanol.  $\lambda_{\text{ex}} = 400$  nm.

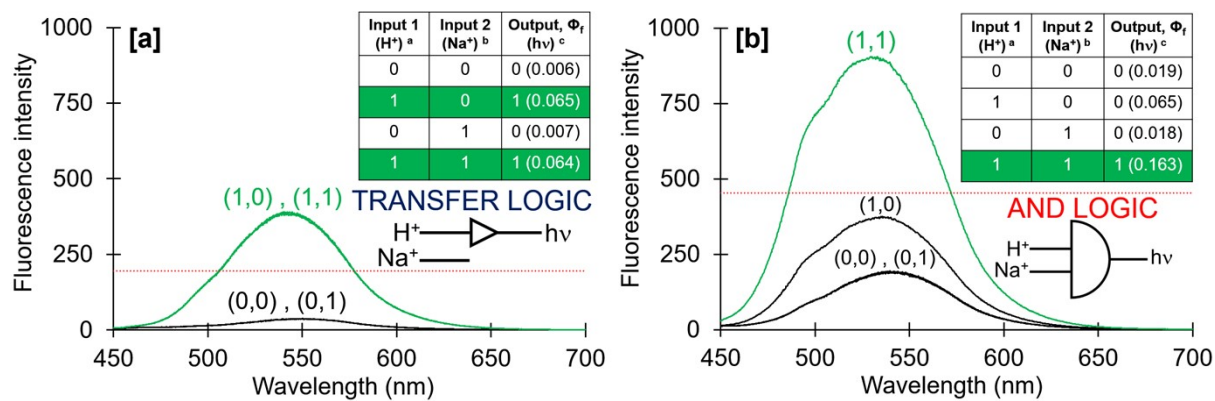

**Figure S42.** Fluorescence emission spectra of 9  $\mu\text{M}$  **3** in (a) water and (b) methanol. The red line denotes the digital threshold, which was set at  $\Phi_{f\text{-max}}/2$ . <sup>a</sup> Low input:  $10^{-11}$  M H<sup>+</sup>, high input:  $10^{-4}$  M H<sup>+</sup>; <sup>b</sup> low input: 0 mM Na<sup>+</sup>, high input: 9 mM Na<sup>+</sup>; <sup>c</sup> Measured with reference to quinine hemisulfate in 0.1 M H<sub>2</sub>SO<sub>4</sub>.

### 3.3. Spectroscopic data for 1-4

**Table S1.** Spectroscopic parameters of **1-4** in water, 1:1 (v/v) water/methanol, and methanol.

| Parameter                                                            | Solvent composition           |          |          |          |                                                  |       |          |          |                                  |       |          |          |
|----------------------------------------------------------------------|-------------------------------|----------|----------|----------|--------------------------------------------------|-------|----------|----------|----------------------------------|-------|----------|----------|
|                                                                      | Water ( $\phi_{H_2O} = 1.0$ ) |          |          |          | 1:1 (v/v) water/methanol ( $\phi_{H_2O} = 0.5$ ) |       |          |          | Methanol ( $\phi_{H_2O} = 0.0$ ) |       |          |          |
|                                                                      | 1                             | 2        | 3        | 4        | 1                                                | 2     | 3        | 4        | 1                                | 2     | 3        | 4        |
| $\lambda_{\text{abs}, 10^{-4} \text{MH}^+}$ (nm)                     | 398                           | 404      | 403      | 392      | 401                                              | 403   | 397      | 389      | 390                              | 391   | 383      | 380      |
| $\lambda_{\text{abs}, 10^{-11} \text{MH}^+}$ (nm)                    | 406                           | 405      | 417      | 406      | 403                                              | 403   | 407      | 413      | 393                              | 393   | 389      | 401      |
| $\epsilon_{10^{-4} \text{MH}^+}$ ( $\text{M}^{-1} \text{cm}^{-1}$ )  | 1660                          | 3772     | 4695     | 3110     | 10951                                            | 11605 | 8306     | 10838    | 11580                            | 12230 | 8698     | 11266    |
| $\epsilon_{10^{-11} \text{MH}^+}$ ( $\text{M}^{-1} \text{cm}^{-1}$ ) | 1361                          | 3190     | 3592     | 2398     | 8972                                             | 10545 | 7347     | 8655     | 10294                            | 11114 | 8259     | 9430     |
| $\lambda_{\text{em}, 10^{-4} \text{MH}^+}$ (nm) <sup>a</sup>         | 542                           | 549      | 540      | 540      | 538                                              | 544   | 537      | 536      | 534                              | 540   | 539      | 520      |
| $\lambda_{\text{em}, 10^{-11} \text{MH}^+}$ (nm) <sup>a</sup>        | 549                           | 551      | 554      | 556      | 546                                              | 547   | 549      | 546      | 540                              | 540   | 540      | 540      |
| $\Delta\lambda_{10^{-4} \text{MH}^+}$ (nm) <sup>b</sup>              | 144                           | 145      | 137      | 148      | 137                                              | 141   | 140      | 147      | 144                              | 149   | 156      | 140      |
| $\Delta\lambda_{10^{-11} \text{MH}^+}$ (nm) <sup>b</sup>             | 143                           | 146      | 137      | 150      | 143                                              | 144   | 142      | 133      | 147                              | 147   | 151      | 139      |
| $\lambda_{\text{isos}}$ (nm)                                         | 345, 440                      | 347, 455 | 338, 416 | 336, 409 | 420                                              | 424   | 322, 409 | 321, 405 | 413                              | 420   | 313, 402 | 315, 394 |
| $\Phi_{\text{F}, 10^{-4} \text{MH}^+}$ <sup>c</sup>                  | 0.064                         | 0.011    | 0.061    | 0.066    | 0.081                                            | 0.022 | 0.064    | 0.050    | 0.115                            | 0.033 | 0.065    | 0.036    |
| $\Phi_{\text{F}, 10^{-11} \text{MH}^+}$ <sup>c</sup>                 | 0.006                         | 0.008    | 0.009    | 0.002    | 0.010                                            | 0.019 | 0.014    | 0.002    | 0.019                            | 0.031 | 0.019    | 0.002    |
| FE <sup>d</sup>                                                      | 15                            | 1.7      | 4.2      | 72       | 3.0                                              | 1.2   | 2.5      | 22       | 2.1                              | 1.1   | 1.4      | 13       |

|                                                                                                                                                                                                                                                                                                                                                                                                                                                  |     |     |     |     |     |     |     |     |     |     |     |     |
|--------------------------------------------------------------------------------------------------------------------------------------------------------------------------------------------------------------------------------------------------------------------------------------------------------------------------------------------------------------------------------------------------------------------------------------------------|-----|-----|-----|-----|-----|-----|-----|-----|-----|-----|-----|-----|
| $pK_a^e$                                                                                                                                                                                                                                                                                                                                                                                                                                         | 9.2 | 9.6 | 8.5 | 8.6 | 8.1 | NA  | 7.4 | 7.5 | 7.7 | 8.3 | 6.9 | 7.1 |
| $pK_a^{*f}$                                                                                                                                                                                                                                                                                                                                                                                                                                      | 8.4 | 8.6 | 8.5 | 8.3 | 7.7 | 7.7 | 7.5 | 7.5 | 7.4 | 7.0 | 6.8 | 7.0 |
| <sup>a</sup> $\lambda_{ex} = 400 \text{ nm}$ . <sup>b</sup> $\Delta\lambda = \lambda_{em} - \lambda_{abs}$ . <sup>c</sup> Measured with reference to quinine hemisulfate in 0.1 M H <sub>2</sub> SO <sub>4</sub> <sup>d</sup> Proton-induced fluorescence enhancement, $I_F / I_F$ $10^{-4} \text{ M H}^+$ $10^{-11} \text{ M H}^+$ . <sup>e</sup> Ground state measurements using eqn. 2. <sup>f</sup> Excited state measurements using eqn. 3. |     |     |     |     |     |     |     |     |     |     |     |     |

#### 4. NMR solvent studies for 3 and 4

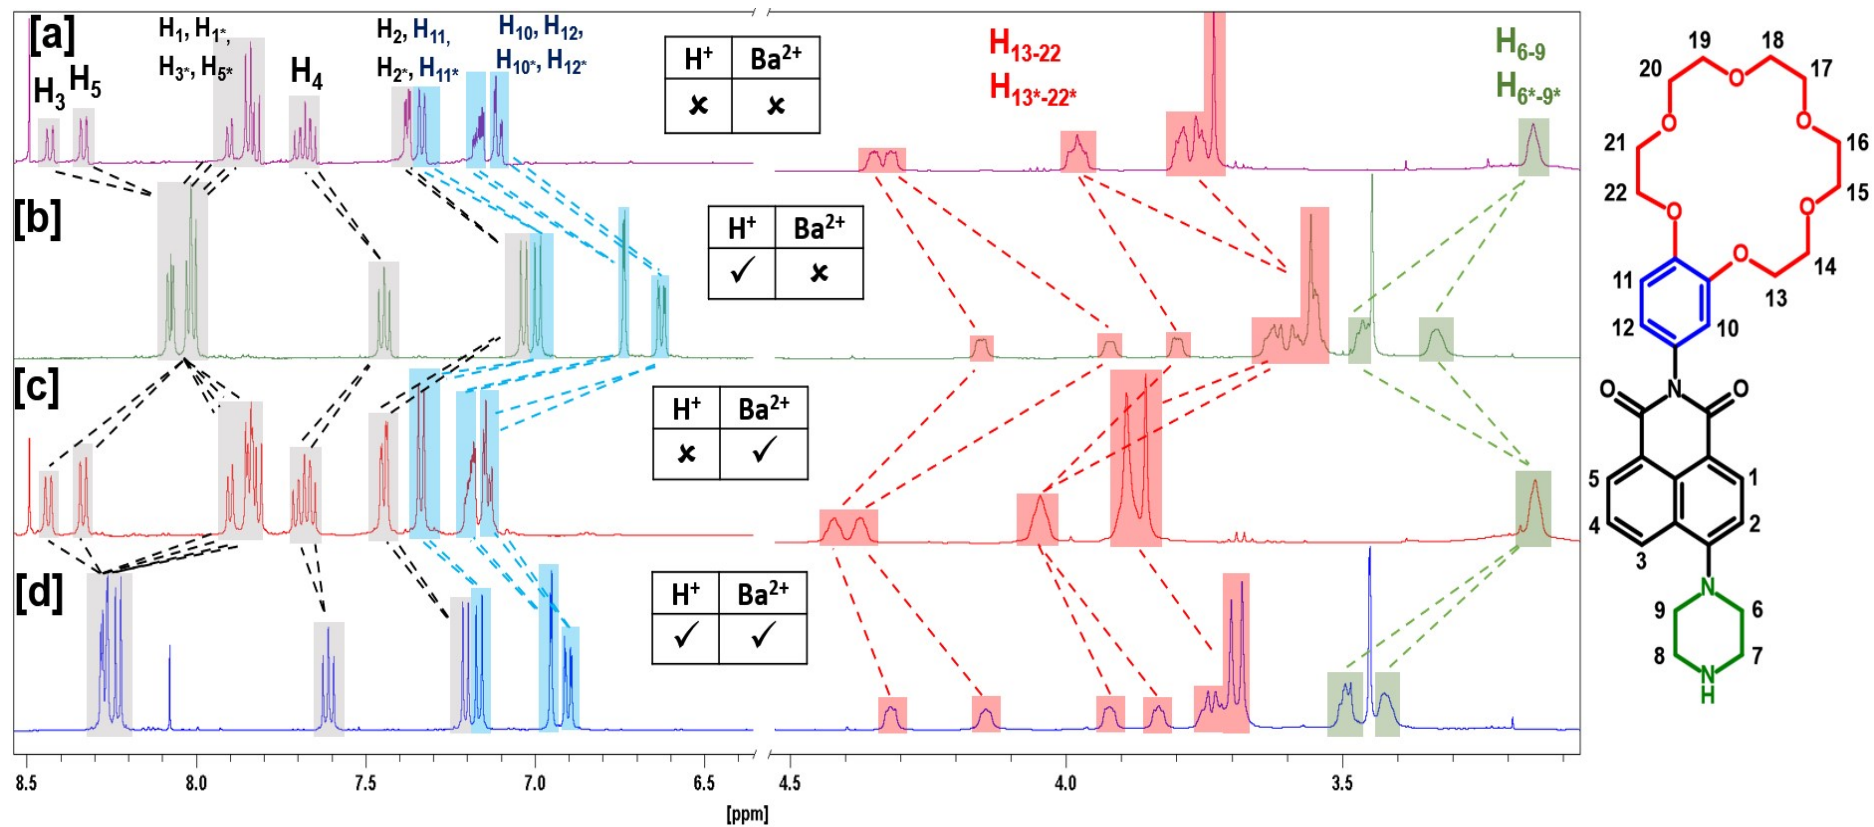

**Figure S43.**  $^1\text{H}$  NMR spectra of 8 mM **4** in  $\text{D}_2\text{O}$ : (a) 50 mM NaOD added, (b) 50 mM DCl added, (c) 50 mM NaOD and 80 mM  $\text{Ba}^{2+}$ , (d) 50 mM DCl and 80 mM  $\text{Ba}^{2+}$ .

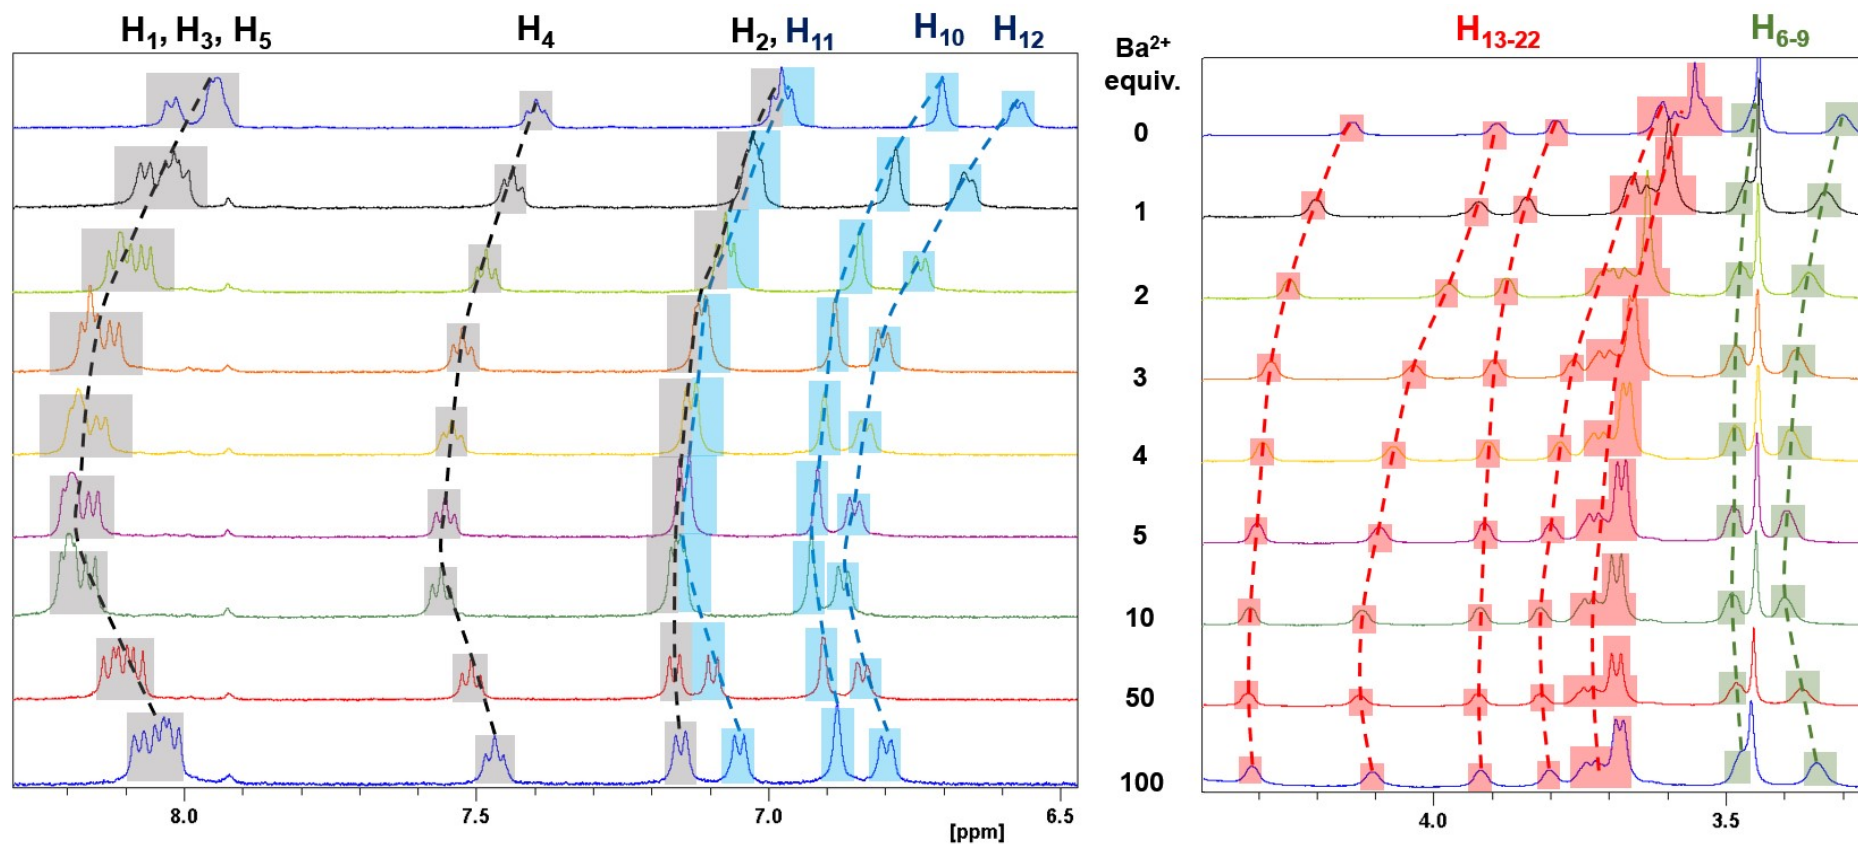

**Figure S44.** <sup>1</sup>H NMR data for 8 mM **4** in 10<sup>-4</sup> M H<sup>+</sup> and 0-100 equivalents (0-800 mM) Ba<sup>2+</sup> in D<sub>2</sub>O.

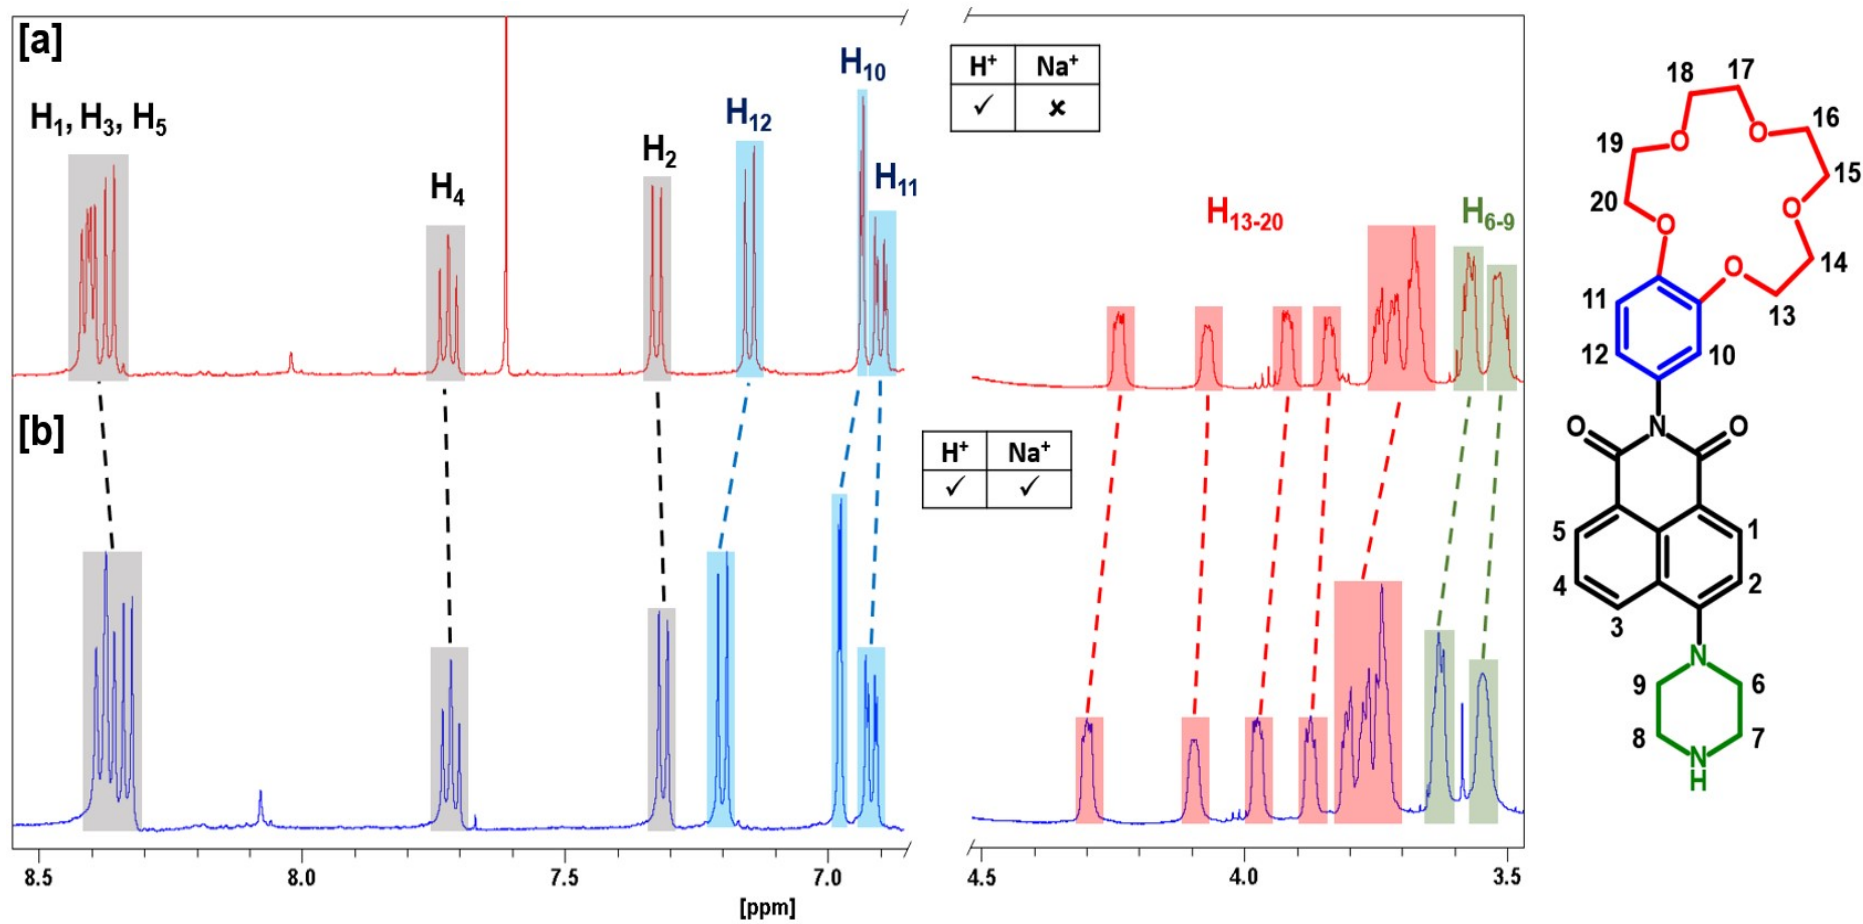

**Figure S45:**  $^1H$  NMR spectra of 12 mM **3** in  $D_2O$  in [a]  $10^{-4}$  M  $H^+$ ; [b]  $10^{-4}$  M  $H^+$  and 120 mM  $Na^+$  (10 equivalents).



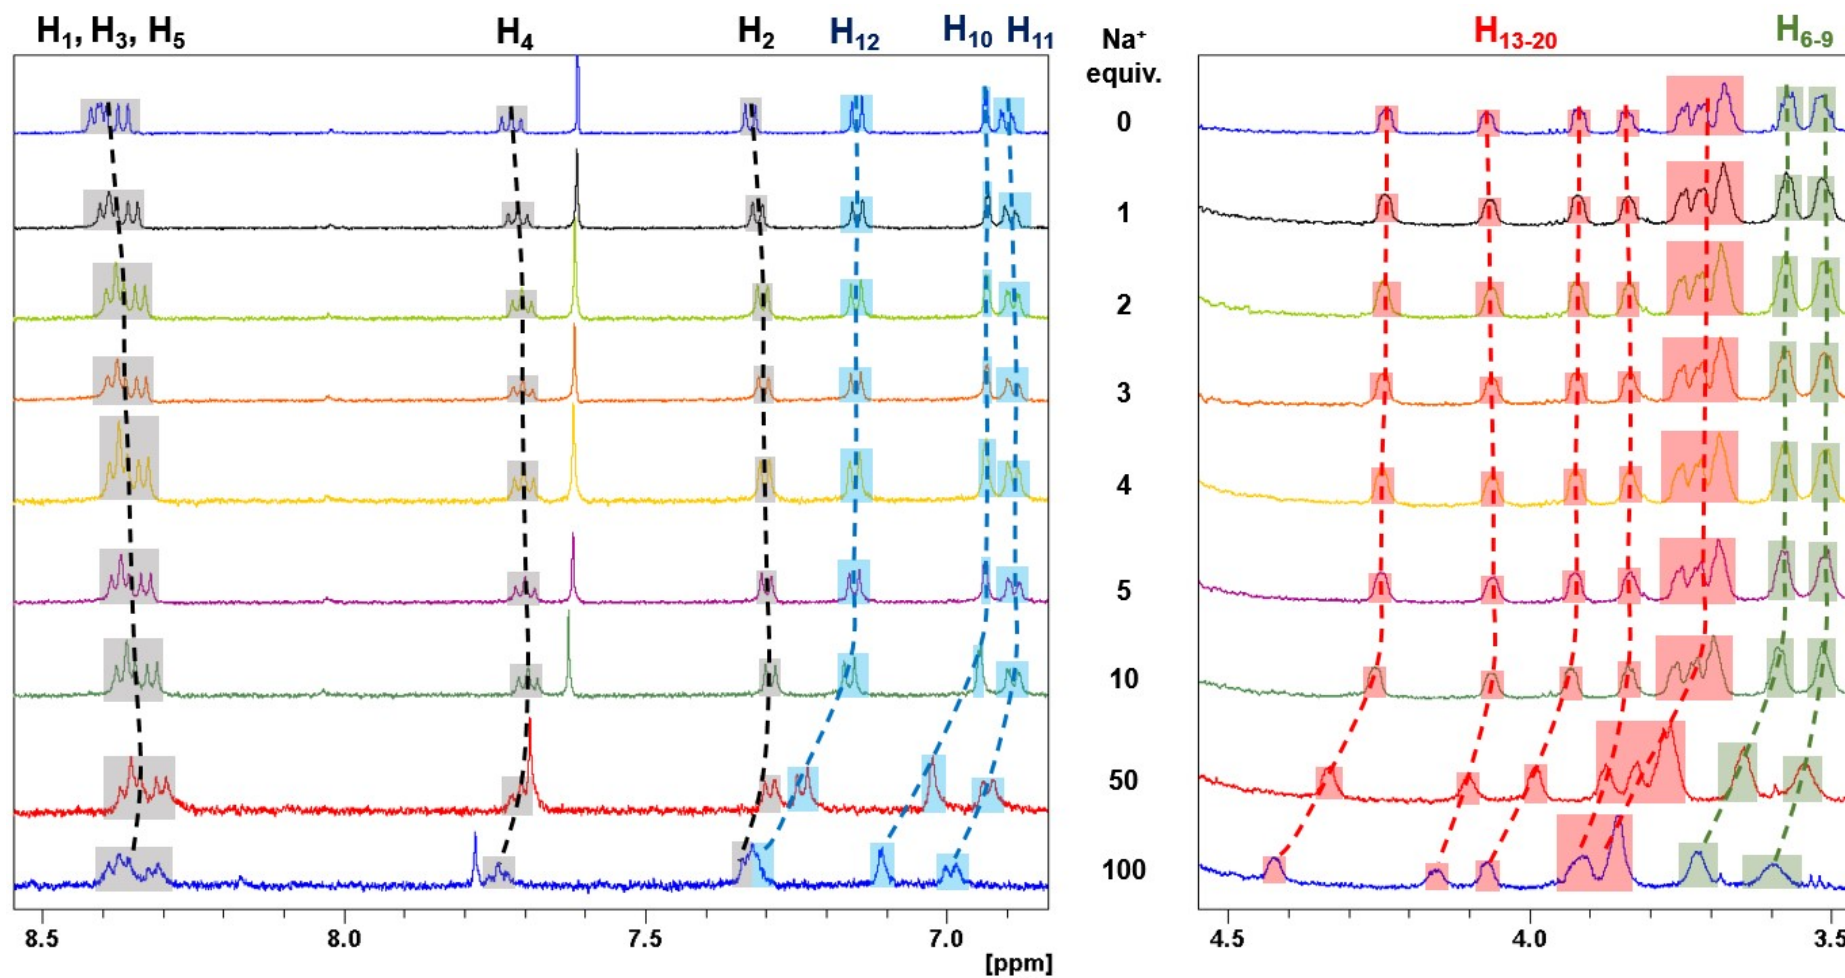

**Figure S46:**  $^1\text{H}$  NMR spectra of  $3\text{-H}^+$  in  $\text{D}_2\text{O}$  with varying  $\text{Na}^+$  equivalents (0 to 100 equivalents; 0 M to 1.2 M).

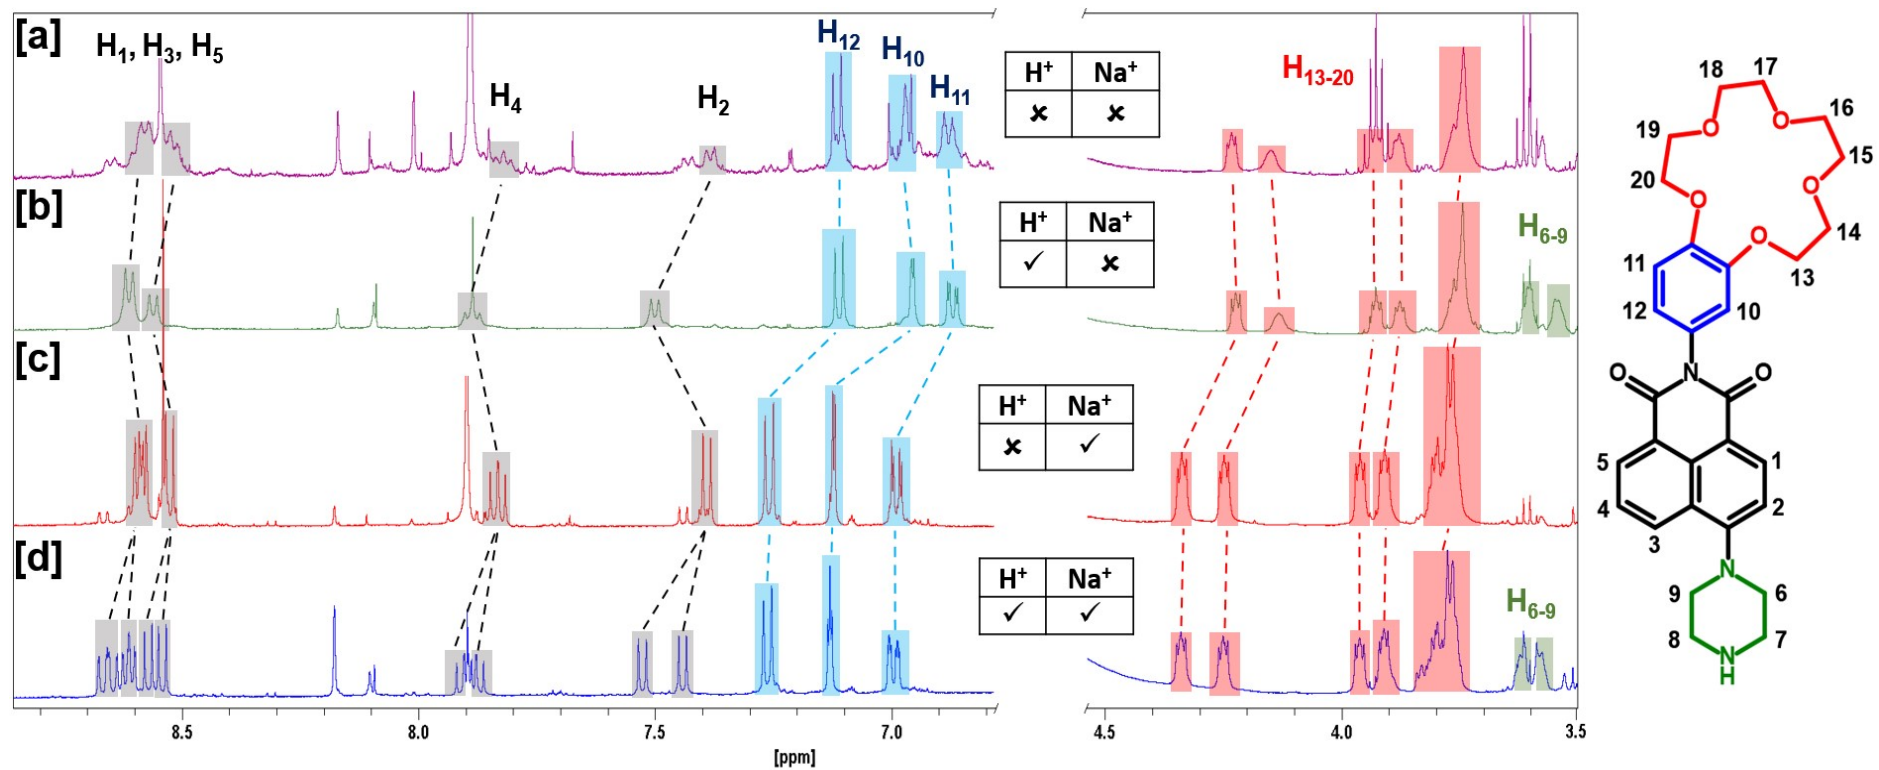

**Figure S47:**  $^1\text{H}$  NMR spectra of 12 mM **3** in  $\text{CD}_3\text{OD}$  in [a]  $10^{-11}$  M  $\text{H}^+$ ; [b]  $10^{-4}$  M  $\text{H}^+$ ; [c]  $10^{-11}$  M  $\text{H}^+$  and 120 mM  $\text{Na}^+$  (10 equivalents); [d]  $10^{-4}$  M  $\text{H}^+$  and 120 mM  $\text{Na}^+$  (10 equivalent).
